# Supplementary material
Source: PubMed Central journal article supplement (PMC416468)
Supplement: gb-2004-5-5-r32-s2.pdf [file gb-2004-5-5-r32-s2.pdf]

## List of PP-Clusters

**Comments.** This file contains the list of clusters of functionally related COGs, found using NJ algorithm and anticorrelation distance measure (see main text for more details). Every PP-cluster includes  $\geq 2$  COGs. In several cases, when there is evidence that PP-cluster includes displacements of orthologous genes (DOGs), the complimentary phyletic patterns of presumably displaced genes (COGs) are included for illustrative purpose. Each pattern is a binary vector of 0s and 1s that indicate presence or absence of given COG in a particular genome. Thus, for convenience, three lines above two complementary patterns list three-letters codes of 66 microbial genomes (see <http://www.ncbi.nlm.nih.gov/COG/new/orgs.html> for full names of organisms) horizontally. For example,

Tma is listed as .  $\begin{matrix} T \\ m \\ a \end{matrix}$

This way presence/absence is easily referred to a genome.

### I. Functional Predictions and Gene Displacements

1) *Specialized system consists of divalent cations transporter and cognate enzyme:*

P\_COG0053 Predicted\_Co/Zn/Cd\_cation\_transporters  
R\_COG2220 Predicted\_Zn-dependent hydrolases

2) *New: Repair or Recombination*

R\_COG1019 Predicted\_nucleotidyltransferase  
L\_COG1111 ERCC4-like\_helicases  
L\_COG1311 Archaeal\_DNA\_polymerase\_II,\_small\_subuni

3) *DOG example: 1189 vs 0293 is a DOG*

TCBBSLSSLCASBMHPVYSEEEPRXNNCMMMFDSNRRBCCTBMUMMACHjHMPPAMMMTTSAPSSE  
mashalppictmmlimcptcccasfmmgltnryopcutppbpupgajpHbahaftjkavspycpc  
acuauaynnrueeonuheyoZseoeAeuCuansrocrnauurneeeypscobuhaacooeaeou  
1111011111111100000000000011110111100001110011110100100000000000: COG1189  
000000000111111111111111000000001110011000000001100111111000111: COG0293  
J\_COG1189 Predicted\_rRNA\_methylase  
J\_COG0293 23S\_rRNA\_methylase  
K\_COG1420 Transcriptional\_regulator\_of\_heat\_shock  
K\_COG2740 Predicted\_nucleic-acid-binding\_protein

4) *DOG example: 0207 vs 1351 is a DOG*

TCBBSLSSLCASBMHPVYSEEEPRXNNCMMMFDSNRRBCCTBMUMMACHjHMPPAMMMTTSAPSSE  
mashalppictmmlimcptcccasfmmgltnryopcutppbpupgajpHbahaftjkavspycpc  
acuauaynnrueeonuheyoZseoeAeuCuansrocrnauurneeeypscobuhaacooeaeou  
011111111111111111111111111111000010000101100000100111100000111: COG0207  
1100000000000000000000000000111001110111100001111011000011111000: COG1351  
F\_COG0207 ThyA\_Thymidylate\_synthase  
F\_COG1351 ThyX\_thymidylate\_synthase

5) *New system presumably involved in rRNA maturation.*

S\_COG0585 Novel\_pseudouridylate\_synthase\_distantly\_related\_to\_TrueB  
R\_COG1444 Predicted\_P-loop\_ATPase\_fused\_to\_an\_acetyltransferase  
A\_COG0430 RNA\_3'-terminal\_phosphate\_cyclase



001100000111110000000000000111010011000110000000000000000000000000:COG1329  
00000000011111000000000010011101111100001000000000000000000000000000:COG1754  
L\_COG0551\_Zn-f\_dom\_assoc w/topois I  
K\_COG1329\_Transcriptional\_regs/CarD  
R\_COG1754\_Unchar\_C-term\_dom-topIA

14) *Presumably new DOG*

TCBBSLSSLCASBMHPVYSEEEPRXNNCMMMFDSNRRBCCTBMUMMACHjHMPPAMMMTTSAPSSE  
mashalppictmmlimcptcccasfmmgltnryopcutppbpupgajpHbahaftjkavspycpc  
acuauaynrueeonuheyoZseoaeAleuCuansrocrnauurneeeypscobuhaacooeaeou  
010011111111111111111111110000011100111110000000111111111111111111111111:COG0120  
1111101110011101011100000011111010110000111111100000000000000000:COG0698  
G\_COG0120\_Ribose\_5-P\_isomerase  
G\_COG0698\_Ribose\_5-P\_isom\_RpiB

15) *DXPS pathway of isoprenoid biosynthesis; new: link with cell wall*

I\_COG0245\_2C-methyl-D-erythritol\_2,4-cyclodiphosph  
I\_COG1211\_4-diphosphocytidyl-2-methyl-D-erithritol  
I\_COG0743\_1-deoxy-D-xylulose\_5-phosphate\_reductois  
IM\_COG0761\_Penicillin\_tolerance\_protein  
I\_COG0821\_Enzyme\_involved\_in\_the\_deoxyxylulose\_path.  
HI\_COG1154\_Deoxyxylulose-5-phosphate\_synthase COG1154  
M\_COG0860\_N-acetylmuramoyl-L-alanine\_amidase  
I\_COG1947\_4-diphosphocytidyl-2C-methyl-D-erythr.  
M\_COG0791\_Cell\_wall-associated\_hydrolases  
S\_COG1496\_Uncharacterized\_conserved\_protein  
H\_COG2022\_Uncharacterized\_enzyme\_of\_thiazole\_bios.

16) *Presumably new DOG*

TCBBSLSSLCASBMHPVYSEEEPRXNNCMMMFDSNRRBCCTBMUMMACHjHMPPAMMMTTSAPSSE  
mashalppictmmlimcptcccasfmmgltnryopcutppbpupgajpHbahaftjkavspycpc  
acuauaynrueeonuheyoZseoaeAleuCuansrocrnauurneeeypscobuhaacooeaeou  
1000000001111111111111111111111111011100000011100000000000000000:COG0817  
1011111110000000000000000000000000000000000000000000000000000000000000:COG1078  
L\_COG0817\_Holliday\_j\_resolvase RuvC  
R\_COG1078\_HD\_sf\_phosphohydrolases

17) *Presumably new DOG*

TCBBSLSSLCASBMHPVYSEEEPRXNNCMMMFDSNRRBCCTBMUMMACHjHMPPAMMMTTSAPSSE  
mashalppictmmlimcptcccasfmmgltnryopcutppbpupgajpHbahaftjkavspycpc  
acuauaynrueeonuheyoZseoaeAleuCuansrocrnauurneeeypscobuhaacooeaeou  
010100000111111011111111111111001111110000001111111111111111000:COG0717  
001011101000000000000001000000001000000011111000000000000000000000:COG1428  
F\_COG0717\_Deoxycytidine\_deaminase  
F\_COG1428\_Deoxynucleoside\_kinases

18) *Presumably new RNA processing system*

J\_COG1514\_2'-5'\_RNA\_ligase  
S\_COG1801\_Uncharacterized\_conserved\_protein

19) *Presumably new functional link: nitrate reductase plus protection against NO/nitrosative stress*

C\_COG1140\_Nitrate\_reductase\_beta\_subunit  
C\_COG5013\_Nitrate\_reductase\_alpha\_subunit  
C\_COG2180\_Nitrate\_reductase\_delta\_subunit  
C\_COG2181\_Nitrate\_reductase\_gamma\_subunit  
P\_COG2223\_Nitrate/nitrite\_transporter  
C\_COG1251\_NAD(P)H-nitrite\_reductase  
S\_COG1742\_Uncharacterized\_conserved\_protein

Q\_COG2162\_Arylamine\_N-acetyltransferase  
S\_COG2764\_Uncharacterized\_protein\_conserved\_in\_bac.

20) *Presumably new functional link: 3931 utilizes histidine*  
E\_COG3931\_Predicted\_N-formylglutamate\_amidohydrolase  
E\_COG3938\_Proline\_racemase

21) *New iron-dependent enzyme complex*  
P\_COG2703\_Hemerythrin  
S\_COG3016\_Uncharacterized\_iron-regulated\_protein  
R\_COG3019\_Predicted\_metal-binding\_protein

22) *Presumably new RNA processing complex*  
J\_COG1096\_Predicted\_RNA-binding\_protein  
J\_COG1097\_RNA-binding\_protein\_Rrp4\_and\_related\_pr  
J\_COG2123\_RNase\_PH-related\_exoribonuclease

23) *New: connection between flagellae and cell shape: medline 12055288  
(flagella vs cell division better studied: from medline 8071236 to  
12471245)*

D\_COG0455\_ATPases\_involved\_in\_chromosome\_partition  
N\_COG1334\_Uncharacterized\_flagellar\_protein\_FlaG  
N\_COG1419\_Flagellar\_GTP-binding\_protein  
S\_COG1699\_Uncharacterized\_protein\_conserved\_in\_bac.  
S\_COG2257\_Uncharacterized\_homolog\_of\_the\_cytoplasmic\_domain\_of\_FhlB  
NT\_COG1776\_Chemotaxis\_protein\_CheC,\_inhibitor  
NT\_COG0643\_Chemotaxis\_protein\_histidine\_kinase  
NT\_COG0840\_Methyl-accepting\_chemotaxis\_protein  
NT\_COG0835\_Chemotaxis\_signal\_transduction\_protein  
NT\_COG1352\_Methylase\_of\_chemotaxis\_methyl-acceptin  
NT\_COG2201\_Chemotaxis\_response\_regulator\_containin  
T\_COG0784\_FOG:\_CheY-like\_receiver  
NT\_COG1871\_Chemotaxis\_protein;\_stimulates\_methylat  
D\_COG1077\_Actin-like\_ATPase\_involved\_in\_cell\_shape\_determination\_MreB  
M\_COG1792\_Cell\_shape-determining\_protein\_MreC  
M\_COG1664\_Integral\_memb.pr.CcmA\_involved\_in\_cell\_shape\_determination  
K\_COG1191\_DNA-directed\_RNA\_polymerase\_specialized\_sigma\_subunit\_FliA  
NU\_COG1317\_Flagellar\_biosynthesis/type\_III\_secret.  
N\_COG1345\_Flagellar\_capping\_protein  
K\_COG1510\_Predicted\_transcriptional\_regulators  
N\_COG1580\_Flagellar\_basal\_body-associated\_protein  
T\_COG1551\_Carbon\_storage\_regulator\_(could\_also\_regulate\_swarming\_and  
quorum\_sensing)

## II. Functionally linked clusters of genes, PP-Clusters

1) *Biosynthesis of amino acids: nearly complete pathways to arginine,  
proline, and histidine*

E\_COG0002\_Acetylglutamate\_semialdehyde\_dehydrogenase  
E\_COG4992\_Ornithine/acetylornithine\_aminotransferase  
E\_COG0548\_Acetylglutamate\_kinase  
CE\_COG0473\_Isocitrate/isopropylmalate\_dehydrogenase  
E\_COG0066\_3-isopropylmalate\_dehydratase\_small\_subu  
E\_COG0119\_Isopropylmalate/homocitrate/citramalate\_  
E\_COG0040\_ATP\_phosphoribosyltransferase  
E\_COG0106\_Phosphoribosylformimino-5-aminoimidazole

E\_COG0107\_Imidazoleglycerol-phosphate\_synthase  
E\_COG0118\_Glutamine\_amidotransferase  
E\_COG0131\_Imidazoleglycerol-phosphate\_dehydratase  
E\_COG0139\_Phosphoribosyl-AMP\_cyclohydrolase  
E\_COG0141\_Histidinol\_dehydrogenase  
E\_COG0140\_Phosphoribosyl-ATP\_pyrophosphohydrolase  
E\_COG0065\_3-isopropylmalate\_dehydratase\_large\_subu  
EH\_COG0028\_Thiamine\_pyrophosphate-requiring\_enzyme  
E\_COG0077\_Prephenate\_dehydratase  
E\_COG0137\_Argininosuccinate\_synthase  
E\_COG0165\_Argininosuccinate\_lyase  
E\_COG0079\_Histidinol-phosphate/aromatic\_aminotrans  
E\_COG0078\_Ornithine\_carbamoyltransferase

2) *Middle portion of purine biosynthesis from phosphoribosylglycinamide*

F\_COG0041\_Phosphoribosylcarboxyaminoimidazole\_(NCA  
F\_COG0046\_Phosphoribosylformylglycinimidine\_(FGAM)  
F\_COG0047\_Phosphoribosylformylglycinimidine\_(FGAM)  
F\_COG0150\_Phosphoribosylaminoimidazole\_(AIR)\_synth  
F\_COG0152\_Phosphoribosylaminoimidazolesuccinocarbo

3) *Two adjoining genes/domains in heme biosynthesis (CobA/CysG)*

H\_COG0007\_Uroporphyrinogen-III\_methylase  
H\_COG1648\_Siroheme\_synthase\_(precorrin-2\_oxidase)

4) *Subunits of glutamate synthase*

E\_COG0067\_Glutamate\_synthase\_domain\_1  
E\_COG0069\_Glutamate\_synthase\_domain\_2  
E\_COG0070\_Glutamate\_synthase\_domain\_3

5) *SbcC/D repair complex*

L\_COG0419\_ATPase\_involved\_in\_DNA\_repair  
L\_COG0420\_DNA\_repair\_exonuclease

6) *Multicomponent transport system*

EP\_COG0444\_ABC-type\_dipeptide/oligopeptide/nickel  
E\_COG4608\_ABC-type\_oligopeptide\_transport\_system  
EP\_COG0601\_ABC-type\_dipeptide/oligopeptide/nickel  
EP\_COG1173\_ABC-type\_dipeptide/oligopeptide/nickel  
E\_COG0747\_ABC-type\_dipeptide\_transport\_system

7) *Transport, amidase may be required*

P\_COG0609\_ABC-type\_Fe<sup>3+</sup>-siderophore\_transport\_syst.  
PH\_COG1120\_ABC-type\_cobalamin/Fe<sup>3+</sup>-siderophores\_tr.  
P\_COG0614\_ABC-type\_Fe<sup>3+</sup>-hydroxamate\_transport\_syst.  
R\_COG1473\_Metal-dependent\_amidase/aminoacylase/car.

8) *Branched-chain amino acid transport system*

E\_COG0410\_ABC-type\_branched-chain\_amino\_acid\_trans.  
E\_COG0559\_Branched-chain\_amino\_acid\_ABC-type\_trans.  
E\_COG4177\_ABC-type\_branched-chain\_amino\_acid\_trans.  
E\_COG0683\_ABC-type\_branched-chain\_amino\_acid\_trans.  
E\_COG0411\_ABC-type\_branched-chain\_amino\_acid\_trans.

9) *Transketolase two-domain complex*

G\_COG3958\_Transketolase\_C-terminal\_subunit  
G\_COG3959\_Transketolase\_N-terminal\_subunit

10) *FixA/B electron transfer complex*

C\_COG2025\_Electron\_transfer\_flavoprotein,\_alpha\_sub.  
C\_COG2086\_Electron\_transfer\_flavoprotein,\_beta\_sub.

11) *Glycine cleavage system*

E\_COG0403\_Glycine\_cleavage\_system\_protein\_P  
E\_COG1003\_Glycine\_cleavage\_system\_protein\_P  
E\_COG0404\_Glycine\_cleavage\_system\_T\_protein  
E\_COG0509\_Glycine\_cleavage\_system\_H\_protein

12) *CO dehydrogenase and its maturation factor*

C\_COG1319\_Aerobic-type\_carbon\_monoxide\_dehydrogen.  
C\_COG2080\_Aerobic-type\_carbon\_monoxide\_dehydrogen.  
C\_COG1529\_Aerobic-type\_carbon\_monoxide\_dehydrogen.  
O\_COG1975\_Xanthine\_and\_CO\_dehydrogenases\_maturat.

13) *Histidine catabolism pathway, Q should probably be changed to E*

Q\_COG1228\_Imidazolonepropionase  
E\_COG2986\_Histidine\_ammonia-lyase  
E\_COG2987\_Urocanate\_hydratase

14) *Two adjoining steps in glyoxylate metabolism. COG2897 possibly also involved*

C\_COG2224\_Isocitrate\_lyase  
C\_COG2225\_Malate\_synthase  
P\_COG2897\_Rhodanese-related\_sulfurtransferase

15) *K<sup>+</sup> transport and K<sup>+</sup>-dependent signal transduction. COG2353 role is unclear*

P\_COG2060\_K+-transporting\_ATPase\_A\_chain  
P\_COG2156\_K+-transporting\_ATPase\_c\_chain  
P\_COG2216\_High-affinity\_K+\_transport\_system\_ATPase  
T\_COG2205\_Osmosensitive\_K+\_channel\_histidine\_kinas.  
S\_COG2353\_Uncharacterized\_conserved\_protein

16) *Molybdopterin biosynthesis, including three new components (1280, 1526, 2050)*

H\_COG0303\_Molybdopterin\_biosynthesis\_enzyme  
H\_COG0521\_Molybdopterin\_biosynthesis\_enzymes  
H\_COG0315\_Molybdenum\_cofactor\_biosynthesis\_enzyme  
P\_COG0725\_ABC-type\_molybdate\_transport\_system  
H\_COG2896\_Molybdenum\_cofactor\_biosynthesis\_enzyme  
H\_COG0314\_Molybdopterin\_converting\_factor,\_large\_sub.  
H\_COG0746\_Molybdopterin-guanine\_dinucleotide\_bios.  
H\_COG1977\_Molybdopterin\_converting\_factor,\_small\_sub.  
Q\_COG2050\_Uncharacterized\_protein,\_possibly\_putative\_thioesterase  
E\_COG1280\_Putative\_threonine\_efflux\_protein #transporter, not threonine  
R\_COG2005\_N-terminal\_domain\_of\_molybdenum-binding  
C\_COG1526\_Uncharacterized\_protein\_required\_for\_formate\_dehydrogenase\_activity

17) *Cytochrome*

C\_COG1271\_Cytochrome\_bd-type\_quinol\_oxidase\_subun  
C\_COG1294\_Cytochrome\_bd-type\_quinol\_oxidase\_subun

18)

G\_COG0380\_Trehalose-6-phosphate\_synthase COG0380  
G\_COG1877\_Trehalose-6-phosphatase COG1877

19) *Two pyrophosphatases (IPPI is related to the nudix family) involved in lipid metabolism*

I\_COG1443\_Isopentenylidiphosphate\_isomerase  
I\_COG2134\_CDP-diacylglycerol\_pyrophosphatase

20) *Two prophage-encoded late proteins*

L\_COG3747\_Phage\_terminase,\_small\_subunit  
R\_COG5562\_Phage\_envelope\_protein

21)

S\_COG0011\_Uncharacterized\_conserved\_protein  
H\_COG0214\_Pyridoxine\_biosynthesis\_enzyme  
H\_COG0311\_Predicted\_glutamine\_amidotransferase

22)

O\_COG0396\_ABC-type\_transport\_system\_involved\_in\_Fe  
O\_COG0719\_ABC-type\_transport\_system\_involved\_in\_Fe

23) *Presumably succinate to propionate conversion (medline 10769117)*

E\_COG1703\_Putative\_periplasmic\_protein\_kinase\_ArgK  
I\_COG1884\_Methylmalonyl-CoA\_mutase,\_N-terminal\_dom.  
I\_COG2185\_Methylmalonyl-CoA\_mutase,\_C-terminal\_dom.

24)

H\_COG1239\_Mg-chelatase\_subunit\_ChII COG1239  
H\_COG1240\_Mg-chelatase\_subunit\_ChID COG1240

25) *Hydantoinases are themselves amidases*

EQ\_COG0145\_N-methylhydantoinase\_A/acetone\_carboxyl.  
EQ\_COG0146\_N-methylhydantoinase\_B/acetone\_carboxyl.  
R\_COG1402\_Uncharacterized\_protein,\_putative\_amidase.

26)

NU\_COG2064\_Flp\_pilus\_assembly\_protein\_TadC.  
U\_COG4962\_Flp\_pilus\_assembly\_protein,\_ATPase\_CpaF.

27) *Almost full aerobic branch of cobalamin (vitamin B12) biosynthesis (medline 11007789)*

H\_COG0368\_Cobalamin-5-phosphate\_synthase  
H\_COG2038\_NaMN:DMB\_phosphoribosyltransferase  
H\_COG1010\_Precorrin-3B\_methylase  
H\_COG2082\_Precorrin\_isomerase  
H\_COG2243\_Precorrin-2\_methylase  
H\_COG2875\_Precorrin-4\_methylase  
H\_COG2241\_Precorrin-6B\_methylase\_1  
H\_COG2242\_Precorrin-6B\_methylase\_2  
H\_COG1797\_Cobyrinic\_acid\_a,c-diamide\_synthase  
H\_COG1492\_Cobyrinic\_acid\_synthase  
H\_COG1270\_Cobalamin\_biosynthesis\_protein\_CobD/CbiB  
H\_COG1903\_Cobalamin\_biosynthesis\_protein\_CbiD  
H\_COG2073\_Cobalamin\_biosynthesis\_protein\_CbiG  
H\_COG1429\_Cobalamin\_biosynthesis\_protein\_CobN\_  
H\_COG2099\_Precorrin-6x\_reductase

28) *Urease and its Ni<sup>++</sup> dependent maturation*

OK\_COG0378\_Ni<sup>2+</sup>-binding\_GTPase\_involved\_in\_regulat.  
E\_COG0804\_Urea\_amidohydrolase\_(urease)\_alpha\_subun.  
E\_COG0831\_Urea\_amidohydrolase\_(urease)\_gamma\_subun.  
E\_COG0832\_Urea\_amidohydrolase\_(urease)\_beta\_subun.  
O\_COG0830\_Urease\_accessory\_protein\_UreF  
O\_COG0829\_Urease\_accessory\_protein\_UreH  
O\_COG2371\_Urease\_accessory\_protein\_UreE  
R\_COG1123\_ATPase\_components\_of\_various\_ABC-type  
P\_COG3376\_High-affinity\_nickel\_permease

29) *Two components of siderophore synthase*

Q\_COG3486\_Lysine/ornithine\_N-monooxygenase  
Q\_COG4264\_Siderophore\_synthetase\_component

30) *Spermidine biosynthesis*

E\_COG0421\_Spermidine\_synthase  
E\_COG1586\_S-adenosylmethionine\_decarboxylase

31) *Two enzymes of tRNA processing*

J\_COG1859\_RNA:NAD\_2'-phosphotransferase  
R\_COG2110\_Predicted\_phosphatase\_homologous\_to\_the\_histone\_2A/X\_domain

32) *Hydrogenase and its maturation (0675 is most likely false positive)*

O\_COG0068\_Hydrogenase\_maturation\_factor  
O\_COG0409\_Hydrogenase\_maturation\_factor  
C\_COG0680\_Ni,Fe-hydrogenase\_maturation\_factor  
O\_COG0298\_Hydrogenase\_maturation\_factor  
R\_COG0375\_Zn\_finger\_protein\_HypA/HybF\_(possibly\_re  
O\_COG0309\_Hydrogenase\_maturation\_factor  
L\_COG0675\_Transposase\_and\_inactivated\_derivatives  
C\_COG0650\_Formate\_hydrogenlyase\_subunit\_4  
C\_COG3260\_Ni,Fe-hydrogenase\_III\_small\_subunit  
C\_COG3261\_Ni,Fe-hydrogenase\_III\_large\_subunit

33)

C\_COG0674\_Pyruvate:ferredoxin\_oxidoreductase  
C\_COG1013\_Pyruvate:ferredoxin\_oxidoreductase  
C\_COG1014\_Pyruvate:ferredoxin\_oxidoreductase

34) *Pfl and NrdD have a similar glycyl radical, apparently produced by 1180;*

O\_COG1180\_Pyruvate-formate\_lyase-activating\_enzyme  
F\_COG1328\_Oxygen-sensitive\_ribonucleoside-triphosp.

35) *Benzoyl-CoA reductase complex*

C\_COG0426\_Uncharacterized\_flavoproteins  
C\_COG1142\_Fe-S-cluster-containing\_hydrogenase\_comp.  
C\_COG1151\_6Fe-6S\_prismane\_cluster-containing\_prot.  
E\_COG1775\_Benzoyl-CoA\_reductase/2-hydroxyglutaryl  
I\_COG1924\_Activator\_of\_2-hydroxyglutaryl-CoA\_dehyd.

36) *Disparate functions in ubiquinone biosynthesis plus two or three (1520, 1765, maybe 1819) false positives*

H\_COG0684\_Demethylmenaquinone\_methyltransferase  
H\_COG3161\_4-hydroxybenzoate\_synthetase\_(chorismate  
GC\_COG1819\_Glycosyl\_transferases\_related\_to\_UDP-g



S\_COG1520\_FOG:\_WD40-like\_repeat  
HC\_COG0543\_2-polyprenylphenol\_hydroxylase\_and\_rela  
O\_COG1765\_Predicted\_redox\_protein,\_regulator\_of\_di

37) *Known complex*

CP\_COG0651\_Formate\_hydrogenlyase\_subunit\_3/Multisub.  
P\_COG1006\_Multisubunit\_Na+/H+\_antiporter,\_MnhC\_sub.  
P\_COG2111\_Multisubunit\_Na+/H+\_antiporter,\_MnhB\_sub.  
P\_COG1320\_Multisubunit\_Na+/H+\_antiporter,\_MnhG\_sub.  
P\_COG1863\_Multisubunit\_Na+/H+\_antiporter,\_MnhE\_sub.  
P\_COG2212\_Multisubunit\_Na+/H+\_antiporter,\_MnhF\_sub.

38) *Transport complex for biotin (medline 12368242)*

P\_COG0803\_ABC-type\_metal\_ion\_transport\_system  
P\_COG1108\_ABC-type\_Mn2+/Zn2+\_transport\_systems  
P\_COG1121\_ABC-type\_Mn/Zn\_transport\_systems\_ATPase  
R\_COG1268\_Uncharacterized\_conserved\_protein

39)

P\_COG0600\_ABC-type\_nitrate/sulfonate/bicarbonate\_t  
P\_COG0715\_ABC-type\_nitrate/sulfonate/bicarbonate\_t  
P\_COG1116\_ABC-type\_nitrate/sulfonate/bicarbonate\_t

40)

C\_COG1148\_Heterodisulfide\_reductase\_subunit\_A  
C\_COG1150\_Heterodisulfide\_reductase\_subunit\_C

41)

H\_COG4054\_Methyl\_coenzyme\_M\_reductase\_beta\_subun.  
H\_COG4055\_Methyl\_coenzyme\_M\_reductase\_subunit\_D  
H\_COG4056\_Methyl\_coenzyme\_M\_reductase\_subunit\_C  
H\_COG4057\_Methyl\_coenzyme\_M\_reductase\_gamma\_subun.  
H\_COG4058\_Methyl\_coenzyme\_M\_reductase\_alpha\_subun.  
H\_COG4059\_Tetrahydromethanopterin\_S-methyltransfer.  
H\_COG4060\_Tetrahydromethanopterin\_S-methyltransfer.  
H\_COG4061\_Tetrahydromethanopterin\_S-methyltransfer.  
H\_COG4062\_Tetrahydromethanopterin\_S-methyltransfer.  
H\_COG4063\_Tetrahydromethanopterin\_S-methyltransfer.  
H\_COG4064\_Tetrahydromethanopterin\_S-methyltransfer.

42)

P\_COG0310\_ABC-type\_Co2+\_transport\_system\_permease  
P\_COG1930\_ABC-type\_cobalt\_transport\_system\_peripl

43)

C\_COG1625\_Fe-S\_oxidoreductase,\_related\_to\_NifB/Moa  
C\_COG1941\_Coenzyme\_F420-reducing\_hydrogenase\_gam.  
C\_COG3259\_Coenzyme\_F420-reducing\_hydrogenase\_alph.

44) *Only part of type IV system*

U\_COG3701\_Type\_IV\_secretory\_pathway,\_TrbF\_componen.  
OU\_COG4959\_Type\_IV\_secretory\_pathway,\_protease\_TraF  
NU\_COG5268\_Type\_IV\_secretory\_pathway,\_TrbD\_component/VirB3  
U\_COG5314\_Conjugal\_transfer/entry\_exclusion\_protein TrbJ/K

45)

O\_COG3175\_Cytochrome\_oxidase\_assembly\_factor

C\_COG3474\_Cytochrome\_c2

46) *New connection w/4321*

E\_COG4311\_Sarcosine\_oxidase\_delta\_subunit  
R\_COG4321\_Uncharacterized\_protein\_related\_to\_aryls.  
E\_COG4583\_Sarcosine\_oxidase\_gamma\_subunit

47)

F\_COG4630\_Xanthine\_dehydrogenase\_iron-sulfur\_clus.  
F\_COG4631\_Xanthine\_dehydrogenase\_molybdopterin-bi.

48)

N\_COG5442\_Flagellar\_biosynthesis\_regulator\_FlaF  
N\_COG5443\_Flagellar\_biosynthesis\_regulator\_FlbT

49)

H\_COG5598\_Trimethylamine:corrinoid\_methyltransferase  
R\_COG5012\_Predicted\_cobalamin\_binding\_protein

50)

P\_COG1348\_Nitrogenase\_subunit\_NifH\_(ATPase)  
C\_COG2710\_Nitrogenase\_molybdenum-iron\_protein

51)

Q\_COG4663\_TRAP-type\_mannitol/chloroaromatic  
Q\_COG4664\_TRAP-type\_mannitol/chloroaromatic  
Q\_COG4665\_TRAP-type\_mannitol/chloroaromatic

52)

H\_COG2998\_ABC-type\_tungstate\_transport\_system  
H\_COG4662\_ABC-type\_tungstate\_transport\_system

53)

V\_COG1401\_GTPase\_subunit\_of\_restriction\_endonuclea      COG1401  
V\_COG4268\_McrBC\_5-methylcytosine\_restriction\_syste      COG4268

54) *Both in folate biosynthesis (should be category H maybe)*

E\_COG3404\_Methenyl\_tetrahydrofolate\_cyclohydrolase  
E\_COG3643\_Glutamate\_formiminotransferase

55) *Polysaccharide hydrolysis system*

G\_COG3669\_Alpha-L-fucosidase  
G\_COG3934\_Endo-beta-mannanase

56) *1479 is anticorrelation artifact; 0531 is probably not AA transporter*

C\_COG0022\_Pyruvate/2-oxoglutarate\_dehydrogenase  
C\_COG1071\_Pyruvate/2-oxoglutarate\_dehydrogenase  
S\_COG1479\_Uncharacterized\_conserved\_protein  
C\_COG0039\_Malate/lactate\_dehydrogenases  
E\_COG0531\_Amino\_acid\_transporters  
C\_COG0508\_Pyruvate/2-oxoglutarate\_dehydrogenase  
C\_COG1249\_Pyruvate/2-oxoglutarate\_dehydrogenase

57)

C\_COG1883\_Na+-transporting\_methylmalonyl-CoA  
C\_COG3630\_Na+-transporting\_methylmalonyl-CoA

C\_COG5016\_Pyruvate/oxaloacetate\_carboxyltransf.

58) Funcster 65

U\_COG3031\_Type\_II\_secretory\_pathway  
U\_COG3149\_Type\_II\_secretory\_pathway  
U\_COG3156\_Type\_II\_secretory\_pathway  
U\_COG3297\_Type\_II\_secretory\_pathway

59) *Prophage late proteins*

R\_COG3628\_Phage\_baseplate\_assembly\_protein\_W  
R\_COG3948\_Phage-related\_baseplate\_assembly\_protein  
R\_COG5004\_P2-like\_prophage\_tail\_protein\_X  
R\_COG4540\_Phage\_P2\_baseplate\_assembly\_protein\_gpV  
R\_COG5301\_Phage-related\_tail\_fibre\_protein  
R\_COG4287\_Phospho-activated\_pathogenicity-related\_pr  
S\_COG4727\_Uncharacterized\_protein\_conserved\_in\_bac  
R\_COG3654\_Prophage\_maintenance\_system\_killer\_prote  
S\_COG4893\_Uncharacterized\_protein\_conserved\_in\_bac  
N\_COG5567\_Predicted\_small\_periplasmic\_lipoprotein

60

R\_COG2358\_TRAP-type\_uncharacterized\_transport\_syst.  
R\_COG4666\_TRAP-type\_uncharacterized\_transport\_syst.

61) *Pili synthesis and assembly*

U\_COG3745\_Flp\_pilus\_assembly\_protein\_CpaB  
S\_COG3795\_Uncharacterized\_protein\_conserved\_in\_bacteria  
S\_COG3813\_Uncharacterized\_protein\_conserved\_in\_bac  
K\_COG4941\_Predicted\_RNA\_polymerase\_sigma\_factor\_co  
U\_COG3847\_Flp\_pilus\_assembly\_protein,\_pilin\_Flp  
U\_COG4964\_Flp\_pilus\_assembly\_protein,\_secretin\_Cpa  
OU\_COG4960\_Flp\_pilus\_assembly\_protein,\_protease\_Cp  
U\_COG4961\_Flp\_pilus\_assembly\_protein\_TadG  
U\_COG4963\_Flp\_pilus\_assembly\_protein,\_ATPase\_CpaE  
U\_COG5010\_Flp\_pilus\_assembly\_protein\_TadD,\_contain

62)

M\_COG1861\_Spore\_coat\_polysaccharide\_biosynthesis  
M\_COG2089\_Sialic\_acid\_synthase  
M\_COG3980\_Spore\_coat\_polysaccharide\_biosynthesis

63)

H\_COG0611\_Thiamine\_monophosphate\_kinase  
H\_COG1564\_Thiamine\_pyrophosphokinase

64)

R\_COG1079\_Uncharacterized\_ABC-type\_transport\_system  
R\_COG3845\_ABC-type\_uncharacterized\_transport\_syste  
R\_COG4603\_ABC-type\_uncharacterized\_transport\_syste  
R\_COG1744\_Uncharacterized\_ABC-type\_transport\_syste  
R\_COG1277\_ABC-type\_transport\_system

65) G\_COG3936\_Protein\_involved\_in\_polysaccharide

S\_COG4502\_Uncharacterized\_protein\_conserved\_in\_bac.  
S\_COG4640\_Predicted\_membrane\_protein  
G\_COG4193\_Beta-\_N-acetylglucosaminidase (phosphate binding site?)  
M\_COG3944\_Capsular\_polysaccharide\_biosynthesis

GM\_COG4464\_Capsular\_polysaccharide\_biosynthesis  
R\_COG3956\_Protein\_containing\_tetrapyrrole\_methyltr.  
M\_COG5577\_Spore\_coat\_protein

66)

Q\_COG4542\_Protein\_involved\_in\_propanediol\_utilizat  
Q\_COG4909\_Propanediol\_dehydratase,\_large\_subunit  
Q\_COG4910\_Propanediol\_dehydratase,\_small\_subunit  
Q\_COG4869\_Propanediol\_utilization\_protein

67) *Other part of type IV secretory pathway*

U\_COG2948\_Type\_IV\_secretory\_pathway\_VirB10\_compon  
U\_COG3504\_Type\_IV\_secretory\_pathway\_VirB9\_compone  
U\_COG3736\_Type\_IV\_secretory\_pathway\_component\_VirB8  
U\_COG3451\_Type\_IV\_secretory\_pathway\_VirB4\_compone  
U\_COG3505\_Type\_IV\_secretory\_pathway\_VirD4\_compone

68)

R\_COG1101\_ABC-type\_uncharacterized\_transport\_syst.  
R\_COG4120\_ABC-type\_uncharacterized\_transport\_syst.  
R\_COG2984\_ABC-type\_uncharacterized\_transport\_syst.

69) *More of type IV and a false discovery (4553 unclear)*

U\_COG3838\_Type\_IV\_secretory\_pathway\_VirB2\_compon.  
I\_COG4553\_Poly-beta-hydroxyalkanoate\_depolymerase  
U\_COG3702\_Type\_IV\_secretory\_pathway\_VirB3\_compon.  
U\_COG3704\_Type\_IV\_secretory\_pathway\_VirB6\_compon.

70) *Fatty acid transfer. Good cluster despite Hamming dist 12 between 2057 and 2031*

I\_COG1788\_Acyl\_CoA:acetate/3-ketoacid\_CoA\_transfer  
I\_COG2057\_Acyl\_CoA:acetate/3-ketoacid\_CoA\_transfer  
I\_COG2031\_Short\_chain\_fatty\_acids\_transporter

71) *More of Type IV*

S\_COG2958\_Uncharacterized\_protein\_conserved\_in\_bact.  
S\_COG4694\_Uncharacterized\_protein\_conserved\_in\_bac.  
U\_COG3843\_Type\_IV\_secretory\_pathway,\_VirD2\_compon.  
U\_COG3846\_Type\_IV\_secretory\_pathway,\_TrbL\_componen.

72) *Bottom part of glycolysis minus dog'ged pgm*

G\_COG0057\_Glyceraldehyde-3-phosphate\_dehydrogenase  
G\_COG0126\_3-phosphoglycerate\_kinase  
G\_COG0148\_Enolase  
G\_COG0149\_Triosephosphate\_isomerase

73)

G\_COG0362\_6-phosphogluconate\_dehydrogenase  
G\_COG0364\_Glucose-6-phosphate\_1-dehydrogenase

74)

NU\_COG1459\_Type\_II\_secretory\_pathway\_component\_Pu  
NU\_COG2804\_Type\_II\_secretory\_pathway\_ATPase\_PulE/  
NU\_COG2165\_Type\_II\_secretory\_pathway\_pseudopilin

75)

P\_COG4604\_ABC-type\_enterochelin\_transport\_system

P\_COG4605\_ABC-type\_enterochelin\_transport\_system  
P\_COG4606\_ABC-type\_enterochelin\_transport\_system  
P\_COG4607\_ABC-type\_enterochelin\_transport\_system

76) *Downstream portion of lysine biosynthesis, 0861 maybe false*

E\_COG0253\_Diaminopimelate\_epimerase  
E\_COG0289\_Dihydrodipicolinate\_reductase  
P\_COG0861\_Membrane\_protein\_TerC  
E\_COG2171\_Tetrahydrodipicolinate\_N-succinyltransfe

77)

GM\_COG1134\_ABC-type\_polysaccharide/polyol\_phosphat.  
GM\_COG1682\_ABC-type\_polysaccharide/polyol\_phosphat.

78)

R\_COG1999\_Uncharacterized\_protein\_SCO1/SenC/PrrC  
C\_COG2857\_Cytochrome\_c1

79)

P\_COG3420\_Nitrous\_oxidase\_accessory\_protein  
K\_COG3901\_Regulator\_of\_nitric\_oxide\_reductase\_tran  
C\_COG4314\_Predicted\_lipoprotein\_involved\_in\_nitrou  
P\_COG3256\_Nitric\_oxide\_reductase\_large\_subunit

80)

C\_COG3245\_Cytochrome\_c5  
C\_COG3658\_Cytochrome\_b

81) *Pili (azurin is probably false, 3310, 4255)*

NU\_COG3167\_Tfp\_pilus\_assembly\_protein\_PilO  
NU\_COG3168\_Tfp\_pilus\_assembly\_protein\_PilP  
NU\_COG3170\_Tfp\_pilus\_assembly\_protein\_FimV  
NU\_COG4968\_Tfp\_pilus\_assembly\_protein\_PilE  
NU\_COG5008\_Tfp\_pilus\_assembly\_protein,\_ATPase\_PilU  
NU\_COG4970\_Tfp\_pilus\_assembly\_protein\_FimT  
S\_COG3310\_Uncharacterized\_protein\_conserved\_in\_bac  
S\_COG4255\_Uncharacterized\_protein\_conserved\_in\_bac  
NU\_COG3215\_Tfp\_pilus\_assembly\_protein\_PilZ  
NU\_COG4726\_Tfp\_pilus\_assembly\_protein\_PilX  
NU\_COG4966\_Tfp\_pilus\_assembly\_protein\_PilW  
C\_COG3241\_Azurin  
NU\_COG3419\_Tfp\_pilus\_assembly\_protein,\_tip-associa  
NU\_COG4972\_Tfp\_pilus\_assembly\_protein,\_ATPase\_PilM

82)

M\_COG1083\_CMP-N-acetylneuraminic\_acid\_synthetase  
S\_COG2830\_Uncharacterized\_protein\_conserved\_in\_bac  
M\_COG3524\_Capsule\_polysaccharide\_export\_protein  
M\_COG3562\_Capsule\_polysaccharide\_export\_protein  
M\_COG3563\_Capsule\_polysaccharide\_export\_protein  
S\_COG2833\_Uncharacterized\_protein\_conserved\_in\_bac  
M\_COG4092\_Predicted\_glycosyltransferase\_involved\_i  
S\_COG3512\_Uncharacterized\_protein\_conserved\_in\_bac  
S\_COG3513\_Uncharacterized\_protein\_conserved\_in\_bac

83)

C\_COG1347\_Na+-transporting\_NADH:ubiquinone\_oxidore

C\_COG1726\_Na+-transporting\_NADH:ubiquinone\_oxidore  
C\_COG2209\_Na+-transporting\_NADH:ubiquinone\_oxidore  
C\_COG2869\_Na+-transporting\_NADH:ubiquinone\_oxidore  
C\_COG2871\_Na+-transporting\_NADH:ubiquinone\_oxidore

84)

S\_COG3778\_Uncharacterized\_protein\_conserved\_in\_bac  
R\_COG4228\_Mu-like\_prophage\_DNA\_circulation\_protein  
R\_COG4379\_Mu-like\_prophage\_tail\_protein\_gpP  
S\_COG4381\_Mu-like\_prophage\_protein\_gp46  
S\_COG4384\_Mu-like\_prophage\_protein\_gp45  
R\_COG4386\_Mu-like\_prophage\_tail\_sheath\_protein\_gpL  
S\_COG4382\_Mu-like\_prophage\_protein\_gp16  
S\_COG4383\_Mu-like\_prophage\_protein\_gp29  
S\_COG4387\_Mu-like\_prophage\_protein\_gp36  
R\_COG4388\_Mu-like\_prophage\_I\_protein  
R\_COG5003\_Mu-like\_prophage\_protein\_gp37  
R\_COG4396\_Mu-like\_prophage\_host-nuclease\_inhibitor  
R\_COG4397\_Mu-like\_prophage\_major\_head\_subunit\_gpT  
R\_COG5005\_Mu-like\_prophage\_protein\_gpG

85)

G\_COG0021\_Transketolase  
H\_COG0196\_FAD\_synthase  
G\_COG0036\_Pentose-5-phosphate-3-epimerase  
G\_COG0191\_Fructose/tagatose\_bisphosphate\_aldolase  
H\_COG0192\_S-adenosylmethionine\_synthetase  
H\_COG1057\_Nicotinic\_acid\_mononucleotide\_adenyltr

86)

L\_COG0178\_Excinuclease\_ATPase\_subunit  
L\_COG0322\_Nuclease\_subunit\_of\_the\_excinuclease\_com  
L\_COG0556\_Helicase\_subunit\_of\_the\_DNA\_excision\_rep

87) *Mostly phylogenetic but distinguishable by a few discordants*

J\_COG1369\_RNase\_P/RNase\_MRP\_subunit\_POP5  
J\_COG1603\_RNase\_P/RNase\_MRP\_subunit\_p30

88)

C\_COG0280\_Phosphotransacetylase COG0280  
C\_COG0282\_Acetate\_kinase COG0282

89)

L\_COG0632\_Holliday\_junction\_resolvasome\_DNA-bind.  
L\_COG2255\_Holliday\_junction\_resolvasome\_helicase

90)

IQ\_COG0304\_3-oxoacyl-(acyl-carrier-protein)\_syntha  
I\_COG0331\_(acyl-carrier-protein)\_S-malonyltransfer

91)

L\_COG1570\_Exonuclease\_VII\_large\_subunit  
L\_COG1722\_Exonuclease\_VII\_small\_subunit

92) *0816 is anticorr.artifact but closer to 1436 than 1436 is to 1527*

L\_COG0816\_Predicted\_endonuclease\_involved\_in\_recom.  
C\_COG1436\_Archaeal/vacuolar-type\_H+-ATPase\_subunit

C\_COG1527\_Archaeal/vacuolar-type\_H+-ATPase\_subunit

93)

IQ\_COG0304\_3-oxoacyl-(acyl-carrier-protein)\_synthase  
I\_COG0331\_(acyl-carrier-protein)\_S-malonyltransferase

94)

L\_COG1570\_Exonuclease\_VII\_large\_subunit  
L\_COG1722\_Exonuclease\_VII\_small\_subunit

95)

I\_COG0332\_3-oxoacyl-acyl-carrier-protein\_synthase  
I\_COG0777\_Acetyl-CoA\_carboxylase\_beta\_subunit  
I\_COG0825\_Acetyl-CoA\_carboxylase\_alpha\_subunit

96) 1219 and 0740; Hamming distance 1 sets 0740 apart from 1219 and closer to 0766

O\_COG1219\_ATP-dependent\_protease\_Clp,\_ATPase\_subunit  
OU\_COG0740\_Protease\_subunit\_of\_ATP-dependent\_Clp\_p

97) 0772/FtsW facilitates septal peptidoglycan synthesis by the transpeptidase FtsI medline 11807049.

M\_COG0766\_UDP-N-acetylglucosamine\_enolpyruvyl\_tran.  
M\_COG0768\_Cell\_division\_protein\_FtsI/penicillin  
D\_COG0772\_Bacterial\_cell\_division\_membrane\_protein  
M\_COG0773\_UDP-N-acetylmuramate-alanine\_ligase  
M\_COG0812\_UDP-N-acetylmuramate\_dehydrogenase

98)

M\_COG0707\_UDP-N-acetylglucosamine:LPS\_N-acetylgluc  
M\_COG0769\_UDP-N-acetylmuramyl\_tripeptide\_synthase  
M\_COG0771\_UDP-N-acetylmuramoylalanine-D-glutamate\_  
M\_COG0770\_UDP-N-acetylmuramyl\_pentapeptide\_synthase

99)

G\_COG1080\_Phosphoenolpyruvate-protein\_kinase  
GT\_COG1762\_Phosphotransferase\_system\_mannitol  
G\_COG1925\_Phosphotransferase\_system,\_HPr-related

100) In fact, discrete (few discordant points make it specific)

J\_COG0227\_Ribosomal\_protein\_L28  
J\_COG0230\_Ribosomal\_protein\_L34  
J\_COG0257\_Ribosomal\_protein\_L36  
J\_COG0238\_Ribosomal\_protein\_S18  
J\_COG0267\_Ribosomal\_protein\_L33  
J\_COG0360\_Ribosomal\_protein\_S6

101)

R\_COG0220\_Predicted\_S-adenosylmethionine-dependent  
J\_COG0564\_Pseudouridylate\_synthases,\_23S\_RNA-spec.

102)

N\_COG1681\_Archaeal\_flagellins  
NU\_COG1955\_Archaeal\_flagella\_assembly\_protein\_J  
NU\_COG2874\_Predicted\_ATPases\_involved\_in\_biogenesis

103)

N\_COG3351\_Putative\_archaeal\_flagellar\_protein\_D/E  
N\_COG3352\_Putative\_archaeal\_flagellar\_protein\_C  
N\_COG3354\_Putative\_archaeal\_flagellar\_protein\_G  
N\_COG3353\_Putative\_archaeal\_flagellar\_protein\_F

104)

G\_COG0058\_Glucan\_phosphorylase  
G\_COG0296\_1,4-alpha-glucan\_branching\_enzyme  
G\_COG0448\_ADP-glucose\_pyrophosphorylase  
G\_COG1523\_Type\_II\_secretory\_pathway\_pullulanase\_P  
G\_COG0297\_Glycogen\_synthase  
G\_COG1640\_4-alpha-glucanotransferase

105)

E\_COG0687\_Spermidine/putrescine-binding\_periplasmi  
E\_COG1176\_ABC-type\_spermidine/putrescine\_transport  
E\_COG1177\_ABC-type\_spermidine/putrescine\_transport  
E\_COG3842\_ABC-type\_spermidine/putrescine\_transport

106)

F\_COG0274\_Deoxyribose-phosphate\_aldolase  
F\_COG0295\_Cytidine\_deaminase  
F\_COG1435\_Thymidine\_kinase

107)

P\_COG0168\_Trk-type\_K+\_transport\_systems,\_membrane\_  
P\_COG0569\_K+\_transport\_systems,\_NAD-binding\_compon

108) *NAD synthesis 3202 may be anticorr artifact*

H\_COG0171\_NAD\_synthase  
FE\_COG0462\_Phosphoribosylpyrophosphate\_synthetase  
C\_COG3202\_ATP/ADP\_translocase  
H\_COG1488\_Nicotinic\_acid\_phosphoribosyltransferase

109)

G\_COG0395\_ABC-type\_sugar\_transport\_system\_permeas  
G\_COG1175\_ABC-type\_sugar\_transport\_systems\_permea  
G\_COG1653\_ABC-type\_sugar\_transport\_system\_peripla  
G\_COG3839\_ABC-type\_sugar\_transport\_systems\_ATPase

110)

P\_COG0226\_ABC-type\_phosphate\_transport\_system  
P\_COG0581\_ABC-type\_phosphate\_transport\_system  
P\_COG1117\_ABC-type\_phosphate\_transport\_syste\_ATP  
P\_COG0573\_ABC-type\_phosphate\_transport\_system  
P\_COG0704\_Phosphate\_uptake\_regulator  
R\_COG0714\_MoxR-like\_ATPases

111)

H\_COG0262\_Dihydrofolate\_reductase  
F\_COG0634\_Hypoxanth-guanine

112)

O\_COG0109\_Polyprenyltransferase  
C\_COG0843\_Heme/copper-type\_cytochrome/quinol\_oxida  
C\_COG1845\_Heme/copper-type\_cytochrome/quinol\_oxida  
C\_COG1622\_Heme/copper-type\_cytochrome/quinol\_oxida



O\_COG1612\_Uncharacterized\_protein\_required\_for\_cyt

113)

I\_COG2030\_Acyl\_dehydratase

I\_COG4799\_Acetyl-CoA\_carboxylase\_carboxyltransfer

114)

I\_COG4770\_Acetyl/propionyl-CoA\_carboxylase\_alpha

I\_COG3243\_Poly(3-hydroxyalkanoate)\_synthetase

115)

G\_COG2273\_Beta-glucanase/Beta-glucan\_synthetase

G\_COG3534\_Alpha-L-arabinofuranosidase

M\_COG3773\_Cell\_wall\_hydrolyses\_involved\_in\_spore

116)

I\_COG4981\_Enoyl\_reductase\_domain\_of\_yeast-type\_FAS

I\_COG4982\_3-oxoacyl-acyl-carrier\_protein\_reductase

117)

G\_COG4282\_Protein\_involved\_in\_beta-1,3-glucan\_synt.

M\_COG5597\_Alpha-N-acetylglucosamine\_transferase

118) *cf f. 3 and 40; system in pieces*

H\_COG0276\_Protoheme\_ferro-lyase\_(ferrochelatae)

H\_COG0407\_Uroporphyrinogen-III\_decarboxylase

H\_COG2226\_Methylase\_involved\_in\_ubiquinone/menaqui

119) *Discontinuous steps of pantothenate biosynthesis*

H\_COG0413\_Ketopantoate\_hydroxymethyltransferase

H\_COG0414\_Panthothenate\_synthetase

H\_COG0853\_Aspartate\_1-decarboxylase

120)

D\_COG0850\_Septum\_formation\_inhibitor

D\_COG2894\_Septum\_formation\_inhibitor-activating\_AT

121)

Q\_COG0767\_ABC-type\_transport\_system\_involved

Q\_COG1127\_ABC-type\_transport\_system\_involved

Q\_COG1463\_ABC-type\_transport\_system\_involved

122)

C\_COG1282\_NAD/NADP\_transhydrogenase\_beta\_subunit

C\_COG3288\_NAD/NADP\_transhydrogenase\_alpha\_subunit

123)

OT\_COG1391\_Glutamine\_synthetase\_adenylyltransferas

O\_COG2844\_UTP:GlnB\_(protein\_PII)\_uridylyltransfera

124) *Conserved part of mevalonate pathway*

I\_COG1257\_Hydroxymethylglutaryl-CoA\_reductase

I\_COG1577\_Mevalonate\_kinase

I\_COG3425\_3-hydroxy-3-methylglutaryl-CoA\_synthase

125)

O\_COG1220\_ATP-dependent\_protease\_HslVU\_(ClpYQ)

O\_COG5405\_ATP-dependent\_protease\_HslVU\_(ClpYQ)

126) *Lipid A biosynthesis*

M\_COG3307\_Lipid\_A\_core\_-\_O-antigen\_ligase  
M\_COG0793\_Periplasmic\_protease  
M\_COG0763\_Lipid\_A\_disaccharide\_synthetase  
M\_COG0774\_UDP-3-O-acyl-N-acetylglucosamine  
M\_COG1043\_Acyl-acyl\_carrier\_protein  
M\_COG1044\_UDP-3-O-3-hydroxymyristoyl\_glucosamine  
U\_COG0848\_Biopolymer\_transport\_protein  
M\_COG1212\_CMP-2-keto-3-deoxyoctulosonic\_acid\_synth.  
M\_COG1519\_3-deoxy-D-manno-octulosonic-acid\_transf.  
M\_COG1663\_Tetraacyldisaccharide-1-P\_4'-kinase  
M\_COG2877\_3-deoxy-D-manno-octulosonic\_acid\_(KDO)

127) =

M\_COG1596\_Periplasmic\_protein\_involved\_in\_polysacc.  
M\_COG3206\_Uncharacterized\_protein\_involved\_in\_exop.

128)

H\_COG0854\_Pyridoxal\_phosphate\_biosynthesis\_protein  
H\_COG1995\_Pyridoxal\_phosphate\_biosynthesis\_protein

129)

P\_COG1118\_ABC-type\_sulfate/molybdate\_transport\_sys.  
P\_COG1613\_ABC-type\_sulfate\_transport\_system  
P\_COG2193\_Bacterioferritin\_(cytochrome\_b1)  
P\_COG4208\_ABC-type\_sulfate\_transport\_system

130)

M\_COG1462\_Uncharacterized\_protein\_involved\_in\_form  
NU\_COG2805\_Tfp\_pilus\_assembly\_protein\_pilus\_retra  
U\_COG4796\_Type\_II\_secretory\_pathway\_component\_Hof

131)

U\_COG2831\_Hemolysin\_activation/secretion\_protein  
U\_COG3210\_Large\_exoproteins\_involved\_in\_heme\_utili

132)

S\_COG0316\_Uncharacterized\_conserved\_protein  
H\_COG0321\_Lipoate-protein\_ligase\_B  
R\_COG0354\_Predicted\_aminomethyltransferase\_related  
HC\_COG0654\_2-polyprenyl-6-methoxyphenol\_hydroxylas  
H\_COG0320\_Lipoate\_synthase  
C\_COG0567\_2-oxoglutarate\_dehydrogenase\_complex

133)

C\_COG2142\_Succinate\_dehydrogenase,\_hydrophobic\_anc  
C\_COG2009\_Succinate\_dehydrogenase/fumarate\_reducta

134)

T\_COG1366\_Anti-anti-sigma\_regulatory\_factor  
TK\_COG2208\_Serine\_phosphatase\_RsbU\_regulator  
T\_COG2172\_Anti-sigma\_regulatory\_factor

135) *Carbohydrate metabolism*

R\_COG1480\_Predicted\_membrane-associated\_HD\_superf

G\_COG3866\_Pectate\_lyase  
G\_COG3867\_Arabinogalactan\_endo-1,4-beta-galactosid.  
R\_COG3872\_Predicted\_metal-dependent\_enzyme

136)

R\_COG3694\_ABC-type\_uncharacterized\_transport\_syst.  
R\_COG4587\_ABC-type\_uncharacterized\_transport\_syst.  
R\_COG4586\_ABC-type\_uncharacterized\_transport\_syst.

137)

J\_COG0064\_Asp-tRNAAsn/Glu-tRNAGln\_amidotransferase  
J\_COG0154\_Asp-tRNAAsn/Glu-tRNAGln\_amidotransferase  
J\_COG0721\_Asp-tRNAAsn/Glu-tRNAGln\_amidotransferase

138)

C\_COG3051\_Citrate\_lyase\_alpha  
C\_COG3052\_Citrate\_lyase\_gamma  
C\_COG3053\_Citrate\_lyase\_synthetasE

139) *Start of mesaconate pathway;*

E\_COG3033\_Tryptophanase  
E\_COG3799\_Methylaspartate\_ammonia-lyase  
E\_COG4865\_Glutamate\_mutase\_epsilon\_subunit

140)

C\_COG0437\_Fe-S-cluster-containing\_hydrogenase\_comp  
C\_COG2864\_Cytochrome\_b\_subunit\_of\_formate\_dehydrog

141)

D\_COG3115\_Cell\_division\_protein  
R\_COG2916\_DNA-binding\_protein\_H-NS  
L\_COG2925\_Exonuclease\_I  
D\_COG3116\_Cell\_division\_protein

142)

C\_COG4656\_Predicted\_NADH:ubiquinone\_oxidoreductase  
C\_COG4657\_Predicted\_NADH:ubiquinone\_oxidoreductase  
C\_COG4659\_Predicted\_NADH:ubiquinone\_oxidoreductase  
C\_COG4660\_Predicted\_NADH:ubiquinone\_oxidoreductase  
C\_COG4658\_Predicted\_NADH:ubiquinone\_oxidoreductase

143)

O\_COG3058\_Uncharacterized\_protein\_involved\_in\_formate\_dehydrogenase\_for  
mation  
R\_COG3302\_DMSO\_reductase\_anchor\_subunit  
P\_COG3303\_Formate-dependent\_nitrite\_reductase  
S\_COG3787\_Uncharacterized\_protein\_conserved\_in\_bact\_distantly\_to  
flavin-dep oxidases

144)

E\_COG0709\_Selenophosphate\_synthase  
J\_COG3276\_Selenocysteine-specific\_translation\_elong.  
E\_COG1921\_Selenocysteine\_synthase\_seryl-tRNASer

145)

O\_COG1138\_Cytochrome\_c\_biogenesis\_factor  
O\_COG2332\_Cytochrome\_c-type\_biogenesis\_protein\_Ccm

O\_COG4133\_ABC-type\_transport\_system  
O\_COG2386\_ABC-type\_transport\_system

146) *cf medline 12874385*

E\_COG1509\_Lysine\_2,3-aminomutase  
J\_COG2269\_Truncated,\_possibly\_inactive,\_lysyl-tRNA

147)

E\_COG2981\_Uncharacterized\_protein\_involved\_in\_cyst  
P\_COG4148\_ABC-type\_molybdate\_transport\_system,\_ATP  
P\_COG4531\_ABC-type\_Zn<sup>2+</sup>\_transport\_system,\_periplas  
E\_COG4160\_ABC-type\_arginine/histidine\_transport\_sy  
E\_COG4215\_ABC-type\_arginine\_transport\_system,\_perm

148)

C\_COG3005\_Nitrate/TMAO\_reductases\_membrane-bound  
C\_COG3043\_Nitrate\_reductase\_cytochrome\_c-type\_sub.  
P\_COG3062\_Uncharacterized\_protein\_involved\_in\_form

149)

M\_COG3040\_Bacterial\_lipocalin  
P\_COG4771\_Outer\_membrane\_receptor\_for\_ferrienteroc  
P\_COG4779\_ABC-type\_enterobactin\_transport\_system

150)

T\_COG3456\_Uncharacterized\_conserved\_protein  
P\_COG4558\_ABC-type\_hemin\_transport\_system  
P\_COG4559\_ABC-type\_hemin\_transport\_system\_ATPase  
P\_COG3721\_Putative\_heme\_iron\_utilization\_protein

151) *slightly different patterns in different groups of genes*

NU\_COG1157\_Flagellar\_biosynthesis/type\_III\_secreto  
NU\_COG1298\_Flagellar\_biosynthesis\_pathway,\_compone  
NU\_COG1338\_Flagellar\_biosynthesis\_pathway,\_compone  
NU\_COG1377\_Flagellar\_biosynthesis\_pathway,\_compone  
N\_COG1536\_Flagellar\_motor\_switch\_protein  
NU\_COG1886\_Flagellar\_motor\_switch/type\_III\_secreto  
N\_COG1256\_Flagellar\_hook-associated\_protein  
N\_COG1558\_Flagellar\_basal\_body\_rod\_protein  
NU\_COG1677\_Flagellar\_hook-basal\_body\_protein  
NU\_COG1684\_Flagellar\_biosynthesis\_pathway,\_compone  
NU\_COG1766\_Flagellar\_biosynthesis/type\_III\_secreto  
N\_COG1815\_Flagellar\_basal\_body\_protein  
N\_COG1843\_Flagellar\_hook\_capping\_protein  
NU\_COG1987\_Flagellar\_biosynthesis\_pathway  
N\_COG4786\_Flagellar\_basal\_body\_rod\_protein  
N\_COG1868\_Flagellar\_motor\_switch\_protein  
N\_COG1291\_Flagellar\_motor\_component  
N\_COG1344\_Flagellin\_and\_related\_hook-associated  
N\_COG1360\_Flagellar\_motor\_protein  
N\_COG1749\_Flagellar\_hook\_protein\_FlgE  
NO\_COG1261\_Flagellar\_basal\_body\_P-ring\_biosyn.  
N\_COG2063\_Flagellar\_basal\_body\_L-ring\_protein  
N\_COG1706\_Flagellar\_basal-body\_P-ring\_protein

152)

R\_COG4174\_ABC-type\_uncharacterized\_transport

R\_COG4239\_ABC-type\_uncharacterized\_transport

153)

E\_COG3138\_Arginine/ornithine\_N-succinyltransferase

E\_COG3724\_Succinylarginine\_dihydrolase

154)

S\_COG4672\_Phage-related\_protein

S\_COG4718\_Phage-related\_protein

S\_COG4723\_Phage-related\_protein\_tail\_component

S\_COG4733\_Phage-related\_protein\_tail\_component

S\_COG5435\_Uncharacterized\_conserved\_protein

155)

H\_COG4138\_ABC-type\_cobalamin\_transport\_system\_ATP

H\_COG4139\_ABC-type\_cobalamin\_transport\_system

156) =

U\_COG4790\_Type\_III\_secretory\_pathway\_component\_Es

U\_COG4669\_Type\_III\_secretory\_pathway\_lipoprotein

U\_COG4789\_Type\_III\_secretory\_pathway\_component\_Es

U\_COG4791\_Type\_III\_secretory\_pathway\_component\_Es

U\_COG4794\_Type\_III\_secretory\_pathway\_component\_Es

157)

R\_COG3822\_ABC-type\_sugar\_transport\_system

R\_COG4158\_Predicted\_ABC-type\_sugar\_transport

158)

NU\_COG3121\_P\_pilus\_assembly\_protein,\_chaperone\_Pap

NU\_COG3188\_P\_pilus\_assembly\_protein,\_porin\_PapC

R\_COG3497\_Phage\_tail\_sheath\_protein\_FI

R\_COG3500\_Phage\_protein\_D

R\_COG3498\_Phage\_tail\_tube\_protein\_FII

R\_COG3499\_Phage\_protein\_U

159)

R\_COG4135\_ABC-type\_uncharacterized\_transport

R\_COG4136\_ABC-type\_uncharacterized\_transport

R\_COG4588\_Accessory\_colonization\_factor\_Acfc

160) *rRNA modification in 0116*

L\_COG0116\_Predicted\_N6-adenine-specific\_DNA\_methyl

J\_COG1534\_Predicted\_RNA-binding\_protein\_containing

161)

G\_COG1105\_Fructose-1-phosphate\_kinase\_and\_related

G\_COG1263\_Phosphotransferase\_system\_IIC\_components

G\_COG1264\_Phosphotransferase\_system\_IIB\_components

G\_COG2190\_Phosphotransferase\_system\_IIA\_components

G\_COG1299\_Phosphotransferase\_system,\_fructose-spec.

G\_COG1445\_Phosphotransferase\_system\_fructose-spec.

G\_COG4668\_Mannitol/fructose-specific\_phosphotransf.

G\_COG2213\_Phosphotransferase\_system,\_mannitol-spec.

S\_COG3037\_Uncharacterized\_protein\_conserved\_in\_bac.

G\_COG3414\_Phosphotransferase\_system,\_galactitol-sp.

162)

G\_COG1869\_ABC-type\_ribose\_transport\_system,\_auxili  
CO\_COG4987\_ABC-type\_transport\_system  
CO\_COG4988\_ABC-type\_transport\_system  
F\_COG1972\_Nucleoside\_permease

163)

G\_COG2160\_L-arabinose\_isomerase  
M\_COG5581\_Predicted\_glycosyltransferase  
G\_COG1440\_Phosphotransferase\_system\_cellobiose-spe  
G\_COG1447\_Phosphotransferase\_system\_cellobiose-spe  
G\_COG1455\_Phosphotransferase\_system\_cellobiose-spe  
G\_COG3444\_Phosphotransferase\_system,\_mannose/fruct  
G\_COG3715\_Phosphotransferase\_system,\_mannose/fruct  
G\_COG3716\_Phosphotransferase\_system,\_mannose/fruct  
K\_COG3711\_Transcriptional\_antiterminator

164)

E\_COG4166\_ABC-type\_oligopeptide\_transport\_system  
E\_COG0765\_ABC-type\_amino\_acid\_transport\_system  
E\_COG1126\_ABC-type\_polar\_amino\_acid\_transport  
ET\_COG0834\_ABC-type\_amino\_acid\_transport/signal

165) *MenBCDEF part of ubiquinone biosynthesis*

H\_COG0447\_Dihydroxynaphthoic\_acid\_synthase  
H\_COG1165\_2-succinyl-6-hydroxy-2,4-cyclohexadiene  
H\_COG1575\_1,4-dihydroxy-2-naphthoate\_octaprenyltr.  
HQ\_COG1169\_Isochorismate\_synthase  
R\_COG1090\_Predicted\_nucleoside-diphosphate\_sugar

166)

Q\_COG1021\_Peptide\_arylation\_enzymes  
Q\_COG3433\_Aryl\_carrier\_domain

167)

C\_COG3029\_Fumarate\_reductase\_subunit\_C  
C\_COG3080\_Fumarate\_reductase\_subunit\_D

168)

G\_COG3001\_Fructosamine-3-kinase  
R\_COG2103\_Predicted\_sugar\_phosphate\_isomerase  
G\_COG2211\_Na+/melibiose\_symporter

169)

G\_COG0246\_Mannitol-1-phosphate/altronate\_dehydrog.  
G\_COG1129\_ABC-type\_sugar\_transport\_system,\_ATPase  
G\_COG1172\_Ribose/xylose/arabinose/galactoside\_ABC  
G\_COG1879\_ABC-type\_sugar\_transport\_system  
G\_COG1593\_TRAP-type\_C4-dicarboxylate\_transport\_sys.  
G\_COG3090\_TRAP-type\_C4-dicarboxylate\_transport\_sys.  
G\_COG1638\_TRAP-type\_C4-dicarboxylate\_transport\_sys.

170)

P\_COG1135\_ABC-type\_metal\_ion\_transport\_system\_ATP  
P\_COG1464\_ABC-type\_metal\_ion\_transport\_system  
P\_COG2011\_ABC-type\_metal\_ion\_transport\_system

171)

S\_COG3698\_Predicted\_periplasmic\_protein  
E\_COG4597\_ABC-type\_amino\_acid\_transport\_system  
R\_COG4134\_ABC-type\_uncharacterized\_transport

172)

O\_COG3088\_Uncharacterized\_protein\_involved\_in\_bios.  
O\_COG4235\_Cytochrome\_c\_biogenesis\_factor

173) *taurine vs phosphonate, medline 10582129*

P\_COG3454\_Metal-dependent\_hydrolase\_involved\_in\_ph  
P\_COG3624\_Uncharacterized\_enzyme\_of\_phosphonate\_me  
P\_COG3625\_Uncharacterized\_enzyme\_of\_phosphonate\_me  
P\_COG3626\_Uncharacterized\_enzyme\_of\_phosphonate\_me  
P\_COG3627\_Uncharacterized\_enzyme\_of\_phosphonate\_me  
P\_COG4107\_ABC-type\_phosphonate\_transport\_system,\_A  
P\_COG4778\_ABC-type\_phosphonate\_transport\_system,\_A  
P\_COG3709\_Uncharacterized\_component\_of\_phosphonate  
P\_COG4525\_ABC-type\_taurine\_transport\_system,\_ATPas  
P\_COG4521\_ABC-type\_taurine\_transport\_system,\_perip  
P\_COG3720\_Putative\_heme\_degradation\_protein

174)

G\_COG4213\_ABC-type\_xylose\_transport\_system  
G\_COG4214\_ABC-type\_xylose\_transport\_system

175)

G\_COG2942\_N-acyl-D-glucosamine\_2-epimerase  
G\_COG3734\_2-keto-3-deoxy-galactonokinase

176)

E\_COG2113\_ABC-type\_proline/glycine\_betaine\_transp.  
E\_COG4175\_ABC-type\_proline/glycine\_betaine\_transp.  
E\_COG4176\_ABC-type\_proline/glycine\_betaine\_transp.

177)

P\_COG4651\_Kef-type\_K+\_transport\_system  
P\_COG3158\_K+\_transporter

178) *Sugar metabolism*

G\_COG1312\_D-mannonate\_dehydratase  
G\_COG2115\_Xylose\_isomerase  
G\_COG1904\_Glucuronate\_isomerase  
E\_COG1897\_Homoserine\_trans-succinylase  
G\_COG2721\_Altronate\_dehydratase  
S\_COG3254\_Uncharacterized\_conserved\_protein

179)

P\_COG1276\_Putative\_copper\_export\_protein  
R\_COG2372\_Uncharacterized\_protein\_homolog\_of\_CopC

180)

P\_COG1178\_ABC-type\_Fe3+\_transport\_system  
H\_COG4143\_ABC-type\_thiamine\_transport\_system  
P\_COG1840\_ABC-type\_Fe3+\_transport\_system

181)

R\_COG2215\_ABC-type\_uncharacterized\_transport\_syste  
R\_COG3683\_ABC-type\_uncharacterized\_transport\_syste

182)

G\_COG3730\_Phosphotransferase\_system\_sorbitol-speci  
G\_COG3731\_Phosphotransferase\_system\_sorbitol-speci  
G\_COG3732\_Phosphotransferase\_system\_sorbitol-speci

183)

G\_COG3684\_Tagatose-1,6-bisphosphate\_aldolase  
G\_COG3775\_Phosphotransferase\_system

184) *ml 12554704*

E\_COG3192\_Ethanolamine\_utilization\_protein  
E\_COG4302\_Ethanolamine\_ammonia-lyase\_small\_sub.  
E\_COG4303\_Ethanolamine\_ammonia-lyase\_large\_sub.  
QC\_COG4576\_Carbon\_dioxide\_concentrating\_mechanism  
QC\_COG4577\_Carbon\_dioxide\_concentrating\_mechanism  
E\_COG4766\_Ethanolamine\_utilization\_protein  
E\_COG4810\_Ethanolamine\_utilization\_protein  
E\_COG4812\_Ethanolamine\_utilization\_cobalamin  
E\_COG4816\_Ethanolamine\_utilization\_protein  
E\_COG4819\_Ethanolamine\_utilization\_protein  
E\_COG4820\_Ethanolamine\_utilization\_protein  
E\_COG4917\_Ethanolamine\_utilization\_protein

185)

E\_COG1125\_ABC-type\_proline/glycine\_betaine\_transp.  
E\_COG1174\_ABC-type\_proline/glycine\_betaine\_transp.  
M\_COG1732\_Periplasmic\_glycine\_betaine/choline-bind

186)

P\_COG3221\_ABC-type\_phosphate/phosphonate\_transport  
P\_COG3638\_ABC-type\_phosphate/phosphonate\_transport  
P\_COG3639\_ABC-type\_phosphate/phosphonate\_transport

187)

R\_COG3740\_Phage\_head\_maturation\_protease  
R\_COG4653\_Predicted\_phage\_phi-C31\_gp36\_major\_capsid

188) *Early phage genes*

S\_COG2369\_Uncharacterized\_protein\_homolog\_of\_phage\_pr  
R\_COG2842\_Uncharacterized\_ATPase\_putative\_transp.  
S\_COG2852\_Uncharacterized\_protein\_conserved\_in\_bac.  
R\_COG3378\_Predicted\_ATPase  
K\_COG3617\_Prophage\_antirepressor  
S\_COG5283\_Phage-related\_tail\_protein  
S\_COG3477\_Predicted\_periplasmic/secreted\_protein  
S\_COG3645\_Uncharacterized\_phage-encoded\_protein  
L\_COG3728\_Phage\_terminase\_small\_subunit  
L\_COG3723\_Recombinational\_DNA\_repair\_protein  
L\_COG4570\_Holliday\_junction\_resolvase  
K\_COG3561\_Phage\_anti-repressor\_protein  
M\_COG3955\_Exopolysaccharide\_biosynthesis\_protein  
R\_COG4416\_Mu-like\_prophage\_protein\_Com  
R\_COG4373\_Mu-like\_prophage\_FluMu\_protein\_gp28  
S\_COG4518\_Mu-like\_prophage\_FluMu\_protein\_gp41



S\_COG5566\_Uncharacterized\_conserved\_protein

189)

G\_COG0153\_Galactokinase

C\_COG1085\_Galactose-1-phosphate\_uridylyltransferase

190)

P\_COG0471\_Di-\_and\_tricarboxylate\_transporters

R\_COG0733\_Na+-dependent\_transporters

E\_COG1115\_Na+/alanine\_symporter

E\_COG0786\_Na+/glutamate\_symporter

191)

M\_COG1346\_Putative\_effector\_of\_murein\_hydrolase

R\_COG1380\_Putative\_effector\_of\_murein\_hydrolase\_Lr

192)

E\_COG1984\_Allophanate\_hydrolase\_subunit\_2

E\_COG2049\_Allophanate\_hydrolase\_subunit\_1

193)

S\_COG2836\_Uncharacterized\_conserved\_protein related to COG0785 cyt c biogenesis prot

C\_COG2863\_Cytochrome\_c553

C\_COG2993\_Cbb3-type\_cytochrome\_oxidase\_cytochrome

O\_COG3278\_Cbb3-type\_cytochrome\_oxidase\_subunit\_1

P\_COG3197\_Uncharacterized\_protein

O\_COG4736\_Cbb3-type\_cytochrome\_oxidase\_subunit\_3

194)

P\_COG0370\_Fe2+\_transport\_system\_protein\_B

P\_COG1918\_Fe2+\_transport\_system\_protein\_A

R\_COG0727\_Predicted\_Fe-S-cluster\_oxidoreductase

195)

C\_COG1838\_Tartrate\_dehydratase\_beta\_subunit

C\_COG1951\_Tartrate\_dehydratase\_alpha\_subunit

196)

H\_COG0043\_3-polyprenyl-4-hydroxyben

H\_COG0163\_3-polyprenyl-4-hydroxybenzoate\_decarbox.

197) 223 1143 and 1894 have Hamming distance 15

C\_COG0377\_NADH:ubiquinone\_oxidoreductase\_20\_kD\_sub

C\_COG0649\_NADH:ubiquinone\_oxidoreductase\_49\_kD\_sub.

C\_COG0852\_NADH:ubiquinone\_oxidoreductase\_27\_kD\_sub.

C\_COG1143\_Formate\_hydrogenlyase\_subunit\_6/NADH:ub.

C\_COG0713\_NADH:ubiquinone\_oxidoreductase\_subunit\_1

C\_COG1008\_NADH:ubiquinone\_oxidoreductase\_subunit\_4

C\_COG0838\_NADH:ubiquinone\_oxidoreductase\_subunit\_3

C\_COG1005\_NADH:ubiquinone\_oxidoreductase\_subunit\_1

C\_COG1007\_NADH:ubiquinone\_oxidoreductase\_subunit\_2

C\_COG0839\_NADH:ubiquinone\_oxidoreductase\_subunit\_6

C\_COG1034\_NADH\_dehydrogenase/NADH:ubiquinone\_oxido

C\_COG1894\_NADH:ubiquinone\_oxidoreductase\_NADH-bin.

C\_COG1905\_NADH:ubiquinone\_oxidoreductase\_24\_kD\_sub.

198)

M\_COG0836\_Mannose-1-phosphate\_guanylyltransferase  
M\_COG1089\_GDP-D-mannose\_dehydratase

199)

M\_COG1088\_dTDP-D-glucose\_4,6-dehydratase  
M\_COG1209\_dTDP-glucose\_pyrophosphorylase  
M\_COG1091\_dTDP-4-dehydrorhamnose\_reductase  
M\_COG1898\_dTDP-4-dehydrorhamnose\_3,5-epimerase  
R\_COG1216\_Predicted\_glycosyltransferases

200)

H\_COG0157\_Nicotinate-nucleotide\_pyrophosphorylase  
H\_COG0379\_Quinolate\_synthase  
H\_COG0422\_Thiamine\_biosynthesis\_protein\_ThiC

201)

M\_COG0859\_ADP-heptose:LPS\_heptosyltransferase  
R\_COG1778\_Low\_specificity\_phosphatase\_(HAD\_superfa  
M\_COG2870\_ADP-heptose\_synthase,\_bifunctional\_sugar

202)

C\_COG0374\_Ni,Fe-hydrogenase\_I\_large\_subunit  
C\_COG1740\_Ni,Fe-hydrogenase\_I\_small\_subunit  
C\_COG1969\_Ni,Fe-hydrogenase\_I\_cytochrome\_b\_subunit

203) *Crux of proline/purine/folate cofactor biosynthesis*

E\_COG0014\_Gamma-glutamyl\_phosphate\_reductase  
E\_COG0263\_Glutamate\_5-kinase  
F\_COG0138\_AICAR\_transformylase/IMP\_cyclohydrolase\_  
F\_COG0299\_Folate-dependent\_phosphoribosylglycinami  
H\_COG0285\_Folylpolyglutamate\_synthase  
F\_COG0026\_Phosphoribosylaminoimidazole\_carboxylase

204)

L\_COG1195\_Recombinational\_DNA\_repair\_ATPase  
L\_COG1381\_Recombinational\_DNA\_repair\_protein

205)

M\_COG1589\_Cell\_division\_septal\_protein  
M\_COG1686\_D-alanyl-D-alanine\_carboxypeptidase  
D\_COG2919\_Septum\_formation\_initiator  
L\_COG4974\_Site-specific\_recombinase\_XerD

206)

D\_COG2177\_Cell\_division\_protein  
D\_COG2884\_Predicted\_ATPase\_involved\_in\_cell\_div.

207)

P\_COG0155\_Sulfite\_reductase\_beta\_subunit  
EH\_COG0175\_3'-phosphoadenosine\_5'-phosphosulfate

208) *Mix of enzymes involved in different aa biosynthesis*

E\_COG0019\_Diaminopimelate\_decarboxylase  
EH\_COG0059\_Ketol-acid\_reductoisomerase  
EG\_COG0129\_Dihydroxyacid\_dehydratase/phosphoglucon  
E\_COG0133\_Tryptophan\_synthase\_beta\_chain

E\_COG0440\_Acetolactate\_synthase\_small

209)

H\_COG0340\_Biotin-(acetyl-CoA\_carboxylase)\_ligase

I\_COG0511\_Biotin\_carboxyl\_carrier\_protein

I\_COG0439\_Biotin\_carboxylase

210) *Repair of protein oxidative damage*

O\_COG0225\_Peptide\_methionine\_sulfoxide\_reductase

O\_COG0229\_Conserved\_domain\_frequently\_associated\_w

O\_COG0652\_Peptidyl-prolyl\_cis-trans\_isomerase\_(rot

211) *First steps in riboflavin biosynthesis*

H\_COG0117\_Pyrimidine\_deaminase

H\_COG0307\_Riboflavin\_synthase\_alpha\_chain

H\_COG0807\_GTP\_cyclohydrolase\_II

212) *Biotin synthesis*

H\_COG0132\_Dethiobiotin\_synthetase

H\_COG0502\_Biotin\_synthase\_and\_related\_enzymes

H\_COG0161\_Adenosylmethionine-8-amino-7-oxononanoat.

214)

U\_COG0805\_Sec-independent\_protein\_secretion\_pathwa

U\_COG1826\_Sec-independent\_protein\_secretion\_pathwa

215)

C\_COG0723\_Rieske\_Fe-S\_protein

C\_COG1290\_Cytochrome\_b\_subunit\_of\_the\_bc\_complex

216) *Pyrimidine biosynthesis plus introgressed tryptophan*

F\_COG0015\_Adenylosuccinate\_lyase

F\_COG0104\_Adenylosuccinate\_synthase

F\_COG0151\_Phosphoribosylamine-glycine\_ligase

EH\_COG0147\_Anthranilate/para-aminobenzoate\_synthas

EH\_COG0512\_Anthranilate/para-aminobenzoate\_synthas

F\_COG0167\_Dihydroorotate\_dehydrogenase

F\_COG0284\_Orotidine-5'-phosphate\_decarboxylase

R\_COG0491\_Zn-dependent\_hydrolases,\_including\_glyox

F\_COG0461\_Orotate\_phosphoribosyltransferase

217) *Pyrimidine biosynthesis*

F\_COG0540\_Aspartate\_carbamoyltransferase,\_catalyti

EF\_COG0458\_Carbamoylphosphate\_synthase\_large\_subun

EF\_COG0505\_Carbamoylphosphate\_synthase\_small\_subun.

218)

E\_COG1605\_Chorismate\_mutase

F\_COG0518\_GMP\_synthase\_-\_Glutamine\_amidotransferase

F\_COG0519\_GMP\_synthase\_PP-ATPase\_domain/subunit

219) *More tryptophane biosynthesis plus other amino acids*

HE\_COG0111\_Phosphoglycerate\_dehydrogenase\_and\_rela

E\_COG0134\_Indole-3-glycerol\_phosphate\_synthase

E\_COG0547\_Anthranilate\_phosphoribosyltransferase

E\_COG0159\_Tryptophan\_synthase\_alpha\_chain

E\_COG0460\_Homoserine\_dehydrogenase

E\_COG0498\_Threonine\_synthase  
E\_COG0287\_Prephenate\_dehydrogenase

220) *Mix of: later steps in riboflavin biosynthesis, trunk of aromatic amino acid biosynthesis*

H\_COG0054\_Riboflavin\_synthase\_beta-chain  
H\_COG0108\_3,4-dihydroxy-2-butanone\_4-phosphate\_syn.  
H\_COG1985\_Pyrimidine\_reductase,\_riboflavin\_biosynt.  
E\_COG0082\_Chorismate\_synthase  
E\_COG0128\_5-enolpyruvylshikimate-3-phosphate\_synth.  
E\_COG0169\_Shikimate\_5-dehydrogenase  
E\_COG0136\_Aspartate-semialdehyde\_dehydrogenase  
E\_COG0527\_Aspartokinases

221) *Isoprenoid derivatives biosynthesis*

I\_COG0020\_Undecaprenyl\_pyrophosphate\_synthase  
H\_COG0142\_Geranylgeranyl\_pyrophosphate\_synthase

222) *Amino acid biosynthesis; 0251 annotation is most likely spurious, it should be an (aa)*

E\_COG0031\_Cysteine\_synthase  
J\_COG0251\_Putative\_translation\_initiation\_inhibito  
E\_COG0626\_Cystathionine\_beta-lyases/cystathionine\_  
E\_COG0337\_3-dehydroquininate\_synthetase  
E\_COG0345\_Pyrroline-5-carboxylate\_reductase

223)

J\_COG2163\_Ribosomal\_protein\_L14E/L6E/L27E  
J\_COG2174\_Ribosomal\_protein\_L34E
