# Supplementary material
Source: PubMed Central journal article supplement (PMC416468)
Supplement: gb-2004-5-5-r32-s3.pdf [file gb-2004-5-5-r32-s3.pdf]

## The quality of a clustering solution

**1. Classification quality indices.** In order to estimate the quality of each clustering solution, we introduced three empirical indices: the “group homogeneity”(GrH), “functional homogeneity,”(FunH), and “uncertainty”(Unc). The first and the second indices indicate the percentage of COGs from the same group/functional category in the cluster (we used definitions of groups and functional categories from the COGs database). The Unc is computed as the percent of poorly characterized COGs in the cluster. Three more indices reflect the statistical properties of the cluster, namely “consistency”(Cons), “average distance between cluster members”(AveD) and “in-cluster variance” (Var) (see comments in additional data file 1 for computational details). The consistency is computed for every cluster member  $x_i^j$  ( $j=1, \dots, N$ ,  $i=1, \dots, n_j$ ;  $N$  is the total number of clusters and  $n_j$  is the number of members in  $j^{\text{th}}$  cluster) separately, as the probability of  $x_i^j$  belonging to the cluster ( $p_{x_i^j}$ ), and then is averaged over all members.

Consider  $j^{\text{th}}$  cluster and let  $k_i$  be the number of COGs in clusters other than  $j$ , which are closer (have smaller distance) to  $x_i^j$  than are on the average COGs in  $j^{\text{th}}$  cluster. Then  $p_{x_i^j}$

is computed as  $p_{x_i^j} = 1 - k_i / \sum_{i=1}^N n_i$ , and the consistency of the  $j^{\text{th}}$  cluster is estimated as

$\hat{c}_j = \sum_{i=1}^{n_j} p_{x_i^j} / n_j$ . AveD is the averaged distance among all members of given cluster and

Var is the average of all distance variances for all cluster members.

**Table 1. The values of classification quality indices for UPGMA/NJ algorithms with different distance measures**

| Members' number thresholds (MNT) | Numb. of clusters | Aver. cluster size | GrH | FunH | Unc | Cons | AveD | In cluster Var. | Total coverage: (lost COGs) | Co-verage in % |
|----------------------------------|-------------------|--------------------|-----|------|-----|------|------|-----------------|-----------------------------|----------------|
|----------------------------------|-------------------|--------------------|-----|------|-----|------|------|-----------------|-----------------------------|----------------|

*Distance measure  $d_r$*

### A)UPGMA

|             |     |        |       |       |       |       |       |       |      |      |
|-------------|-----|--------|-------|-------|-------|-------|-------|-------|------|------|
| Without MNT | 67  | 21.194 | 0.712 | 0.598 | 0.371 | 0.988 | 0.174 | 0.085 | 3169 | 69.1 |
| 50          | 157 | 21.038 | 0.632 | 0.458 | 0.431 | 0.944 | 0.358 | 0.133 | 1286 | 28.0 |
| 100         | 115 | 31.870 | 0.619 | 0.439 | 0.430 | 0.914 | 0.394 | 0.145 | 924  | 20.1 |
| 150         | 96  | 38.812 | 0.618 | 0.436 | 0.431 | 0.901 | 0.418 | 0.153 | 863  | 18.8 |
| 200         | 82  | 46.451 | 0.615 | 0.431 | 0.432 | 0.887 | 0.439 | 0.155 | 780  | 17.0 |
| 250         | 70  | 54.886 | 0.626 | 0.438 | 0.449 | 0.875 | 0.455 | 0.161 | 747  | 16.3 |

### B)NJ

|             |     |        |       |       |       |       |       |       |      |      |
|-------------|-----|--------|-------|-------|-------|-------|-------|-------|------|------|
| Without MNT | 72  | 17.806 | 0.700 | 0.580 | 0.344 | 0.985 | 0.177 | 0.095 | 3307 | 72.1 |
| 50          | 167 | 21.521 | 0.616 | 0.432 | 0.451 | 0.929 | 0.393 | 0.154 | 995  | 21.7 |
| 100         | 111 | 34.351 | 0.596 | 0.416 | 0.445 | 0.887 | 0.436 | 0.158 | 776  | 16.9 |

|     |    |        |       |       |       |       |       |       |     |      |
|-----|----|--------|-------|-------|-------|-------|-------|-------|-----|------|
| 150 | 90 | 42.867 | 0.605 | 0.422 | 0.458 | 0.867 | 0.460 | 0.165 | 731 | 15.9 |
| 200 | 74 | 53.243 | 0.614 | 0.428 | 0.468 | 0.841 | 0.479 | 0.170 | 649 | 14.1 |
| 250 | 56 | 73.196 | 0.621 | 0.428 | 0.455 | 0.792 | 0.496 | 0.175 | 490 | 10.7 |

*Distance measure  $d_{r2}$*

**A)UPGMA**

|             |     |        |       |       |       |       |       |       |      |      |
|-------------|-----|--------|-------|-------|-------|-------|-------|-------|------|------|
| Without MNT | 60  | 16.617 | 0.733 | 0.611 | 0.386 | 0.984 | 0.379 | 0.163 | 3592 | 78.3 |
| 50          | 197 | 20.071 | 0.609 | 0.413 | 0.424 | 0.928 | 0.596 | 0.158 | 635  | 13.8 |
| 100         | 135 | 31.474 | 0.595 | 0.392 | 0.404 | 0.887 | 0.633 | 0.157 | 340  | 7.4  |
| 150         | 109 | 39.578 | 0.587 | 0.391 | 0.425 | 0.862 | 0.666 | 0.158 | 275  | 6.0  |
| 200         | 94  | 47.032 | 0.581 | 0.384 | 0.421 | 0.840 | 0.688 | 0.157 | 168  | 3.7  |
| 250         | 83  | 53.386 | 0.588 | 0.382 | 0.415 | 0.822 | 0.711 | 0.157 | 158  | 3.4  |

**B)NJ**

|            |     |         |       |       |       |       |       |       |      |      |
|------------|-----|---------|-------|-------|-------|-------|-------|-------|------|------|
| WithoutMNT | 80  | 14.025  | 0.701 | 0.576 | 0.412 | 0.975 | 0.378 | 0.172 | 3467 | 75.6 |
| 50         | 170 | 24.694  | 0.607 | 0.405 | 0.444 | 0.903 | 0.631 | 0.170 | 391  | 8.5  |
| 100        | 97  | 45.289  | 0.582 | 0.373 | 0.417 | 0.817 | 0.675 | 0.167 | 196  | 4.3  |
| 150        | 64  | 69.031  | 0.574 | 0.368 | 0.405 | 0.740 | 0.721 | 0.173 | 171  | 3.7  |
| 200        | 52  | 85.327  | 0.566 | 0.367 | 0.399 | 0.688 | 0.736 | 0.172 | 152  | 3.3  |
| 250        | 42  | 105.952 | 0.555 | 0.350 | 0.404 | 0.629 | 0.755 | 0.169 | 139  | 3.0  |

*Distance measure  $d_{r1}$*

**A)UPGMA**

|            |     |        |       |       |       |       |       |       |      |      |
|------------|-----|--------|-------|-------|-------|-------|-------|-------|------|------|
| WithoutMNT | 60  | 16.250 | 0.720 | 0.618 | 0.357 | 0.982 | 0.186 | 0.099 | 3614 | 78.8 |
| 50         | 173 | 19.075 | 0.634 | 0.457 | 0.426 | 0.952 | 0.348 | 0.128 | 1289 | 28.1 |
| 100        | 120 | 30.708 | 0.637 | 0.454 | 0.424 | 0.921 | 0.370 | 0.133 | 904  | 19.7 |
| 150        | 100 | 38.000 | 0.634 | 0.451 | 0.420 | 0.909 | 0.389 | 0.138 | 789  | 17.2 |
| 200        | 91  | 42.275 | 0.634 | 0.451 | 0.421 | 0.902 | 0.403 | 0.140 | 742  | 16.2 |
| 250        | 82  | 47.232 | 0.642 | 0.452 | 0.408 | 0.890 | 0.421 | 0.145 | 716  | 15.6 |

**B)NJ**

|            |     |        |       |       |       |       |       |       |      |      |
|------------|-----|--------|-------|-------|-------|-------|-------|-------|------|------|
| WithoutMNT | 91  | 15.868 | 0.702 | 0.584 | 0.413 | 0.984 | 0.173 | 0.092 | 3145 | 68.5 |
| 50         | 167 | 21.623 | 0.618 | 0.427 | 0.434 | 0.928 | 0.378 | 0.144 | 978  | 21.3 |
| 100        | 110 | 35.355 | 0.627 | 0.422 | 0.421 | 0.889 | 0.423 | 0.152 | 700  | 15.3 |
| 150        | 88  | 45.193 | 0.621 | 0.418 | 0.423 | 0.862 | 0.444 | 0.161 | 612  | 13.3 |
| 200        | 70  | 57.986 | 0.599 | 0.403 | 0.447 | 0.834 | 0.465 | 0.165 | 530  | 11.5 |
| 250        | 62  | 65.887 | 0.599 | 0.407 | 0.459 | 0.832 | 0.464 | 0.163 | 504  | 11.0 |

**2. Predictive power.** Using the descriptions of 52 metabolic pathways and functional systems (<http://www.ncbi.nlm.nih.gov/cgi-bin/COG/palox?sys=all>), we compared the predictive power (PPs) of UPGMA and NJ with different distance measures (Table 2).

**Table 2. The performance (predictive power) of UPGMA/NJ algorithms with different distance measures**

| <b>Pathways and functional systems</b><br>( <a href="http://www.ncbi.nlm.nih.gov/cgi-bin/COG/palox?sys=all">http://www.ncbi.nlm.nih.gov/cgi-bin/COG/palox?sys=all</a> ) | NJAC250* | NJAC250† | UPAC250‡ | UP250§ |
|-------------------------------------------------------------------------------------------------------------------------------------------------------------------------|----------|----------|----------|--------|
| AMINOACYL-tRNA_SYN                                                                                                                                                      | 11.5     | 11.5     | 53.8     | 11.5   |
| ARCHAEAL-VACUOLAR-TYPE H+-ATPASE SUBUNITS                                                                                                                               | 77.8     | 88.9     | 66.7     | 88.9   |
| ARGININE_BIOSYNTHESIS                                                                                                                                                   | 63.6     | 27.3     | 81.8     | 90.9   |
| BASAL_REPL_MACHINERY                                                                                                                                                    | 38.5     | 30.8     | 34.6     | 38.5   |
| BASAL_TF                                                                                                                                                                | 81.8     | 45.5     | 72.7     | 54.5   |
| BIOTIN_BIOSYNTHESIS                                                                                                                                                     | 66.7     | 50       | 50       | 50     |
| COBALAMIN_BIOSYNTHESIS                                                                                                                                                  | 77.8     | 72.2     | 77.8     | 77.8   |
| COENZYME_A_BIOSYNTHESIS                                                                                                                                                 | 33.3     | 22.2     | 33.3     | 33.3   |
| DEOXYXYLULOSE_PATHWAY_OF_TERPENOID BIOSYNTHESIS                                                                                                                         | 100      | 100      | 100      | 100    |
| DNA_POLIII_SUB                                                                                                                                                          | 37.5     | 50       | 37.5     | 50     |
| DNA-DEPENDENT_RNA_POL                                                                                                                                                   | 40       | 40       | 46.7     | 40     |
| ENTNER-DOUDOROFF_PATHWAY                                                                                                                                                | 50       | 50       | 25       | 75     |
| F0F1-TYPE_ATP_SYN                                                                                                                                                       | 77.8     | 77.8     | 77.8     | 77.8   |
| FAD_BIOSYNTHESIS                                                                                                                                                        | 44.4     | 66.7     | 33.3     | 44.4   |
| FATTY_ACID_BIOSYNTHESIS                                                                                                                                                 | 38.5     | 38.5     | 38.5     | 46.2   |
| FLAGELLUM                                                                                                                                                               | 66.7     | 66.7     | 75.8     | 75.8   |
| GLUCONEOGENESIS                                                                                                                                                         | 35.7     | 14.3     | 28.6     | 7.1    |
| GLYCOLYSIS                                                                                                                                                              | 35.7     | 14.3     | 35.7     | 7.1    |
| GLYOXYLATE_BYPASS                                                                                                                                                       | 100      | 100      | 100      | 100    |
| HEME_BIOSYNTHESIS                                                                                                                                                       | 21.4     | 21.4     | 21.4     | 21.4   |
| HISTIDINE_BIOSYNTHESIS                                                                                                                                                  | 83.3     | 66.7     | 75       | 75     |
| ISOLEUCINE_BIOSYNTHESIS                                                                                                                                                 | 83.3     | 83.3     | 66.7     | 100    |
| LEUCINE_BIOSYNTHESIS                                                                                                                                                    | 50       | 80       | 80       | 90     |
| LIPID_BIOS                                                                                                                                                              | 100      | 100      | 100      | 100    |
| MENAQUINONE_BIOSYNTHESIS                                                                                                                                                | 25       | 25       | 31.2     | 31.2   |
| METHIONINE_BIOSYNTHESIS                                                                                                                                                 | 40       | 30       | 50       | 50     |
| MULTISUBUNIT_NA+-H+_ANTIPORTER                                                                                                                                          | 75       | 62.5     | 75       | 62.5   |
| NA+-TRANSPORTING_NADHUBIQUINONE OXIDOREDUCTASE_SUBUNITS                                                                                                                 | 85.7     | 85.7     | 85.7     | 85.7   |
| NAD_BIOSYNTHESIS                                                                                                                                                        | 42.9     | 28.6     | 42.9     | 42.9   |
| NADHUBIQUINONE_OXIDOREDUCTASE SUBUNITS                                                                                                                                  | 86.7     | 86.7     | 86.7     | 86.7   |

|                                     |      |      |      |      |
|-------------------------------------|------|------|------|------|
| PENTOSE_PHOSPHATE_PATHWAY           | 33.3 | 55.6 | 22.2 | 55.6 |
| PHENYLALANINE-TYROSINE_BIOSYNTHESIS | 42.9 | 35.7 | 57.1 | 57.1 |
| PREPROTEIN_TRANSLOCASE_SUBUNITS     | 44.4 | 44.4 | 44.4 | 55.6 |
| PROLINE_BIOSYNTHESIS                | 60   | 60   | 40   | 80   |
| PURINE_BIOSYNTHESIS                 | 33.3 | 33.3 | 66.7 | 83.3 |
| PURINE_SALVAGE                      | 20   | 40   | 40   | 20   |
| PYRIDOXAL_PHOSPHATE_BIOSYNTHESIS    | 37.5 | 37.5 | 50   | 25   |
| PYRIMIDINE_BIOSYNTHESIS             | 42.9 | 50   | 57.1 | 57.1 |
| PYRIMIDINE_SALVAGE                  | 40   | 30   | 40   | 30   |
| PYRUVATE_DECARBOXYLATION            | 42.9 | 42.9 | 42.9 | 42.9 |
| RIBOFLAVIN_BIOSYNTHESIS             | 42.9 | 85.7 | 42.9 | 42.9 |
| RIBOSOMAL_PROTEINS_LS               | 45.1 | 27.5 | 56.9 | 35.3 |
| RIBOSOMAL_PROTEINS_SS               | 34.4 | 31.2 | 43.8 | 31.2 |
| TCA_CYCLE                           | 18.8 | 12.5 | 18.8 | 18.8 |
| TF_AND_INVOLVED_ENZYMES             | 40.9 | 40.9 | 63.6 | 40.9 |
| THIAMINE_BIOSYNTHESIS               | 20   | 20   | 30   | 60   |
| THREONINE_BIOSYNTHESIS              | 80   | 80   | 80   | 80   |
| THYMIDYLATE_BIOSYNTHESIS            | 10   | 30   | 20   | 10   |
| TRANSCR_REG                         | 10   | 11.4 | 20   | 11.4 |
| TRYPTOPHAN_BIOSYNTHESIS             | 52.9 | 52.9 | 64.7 | 64.7 |
| UBIQUINONE_BIOSYNTHESIS             | 40   | 20   | 26.7 | 26.7 |
| VALINE_BIOSYNTHESIS                 | 66.7 | 83.3 | 83.3 | 100  |
| Average:                            | 50.6 | 49.3 | 53.8 | 54.7 |
| Gene Displacements                  | 83   | 47   | 53   | 43   |

\*NJ with distance measure  $d_{r2}$ ;

†NJ with distance measure  $d_r$ ;

‡UPGMA with distance measure  $d_{r2}$ ;

§UPGMA with distance measure  $d_r$

**3. Weighting schemes.** We were interested whether weighting of phyletic patterns may improve discovery of functional links. For example, patterns shared by many COGs may have different functional significance than patterns including only a few COGs. Second, the probability that two patterns belong to the same pathway or functional system could be higher when they have similar rate of evolutionary gain and loss, so one can introduce a term accounting for the rate of pattern changes in evolution. Third, one can take into account the phylogenetic breadth at which co-inheritance is observed – if two genes are co-gained or co-lost once in bacteria and another time in archaea, this may have different significance than two such events within, say, alphaproteobacteria. We tried to weight the distance measure by accounting for each of these effects individually, measured an

increase in recovery (predictive power) of a pathway or functional system. None of these weighting approaches improved the PP of the pairs “distance measure + algorithm”.
