# Supplementary material
Source: PubMed Central journal article supplement (PMC416468)

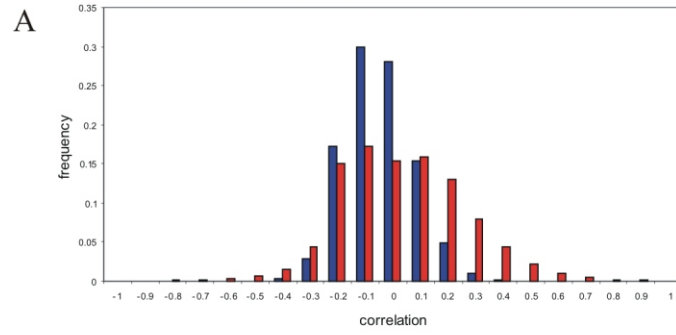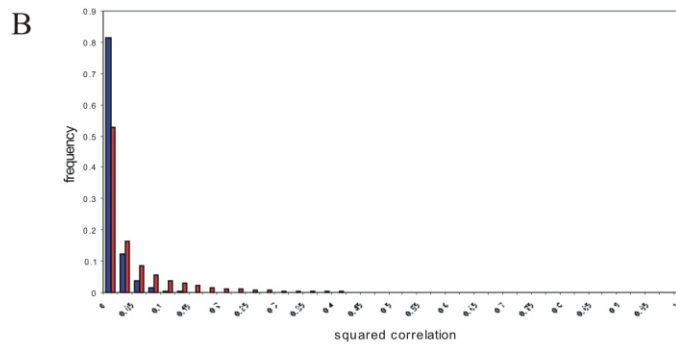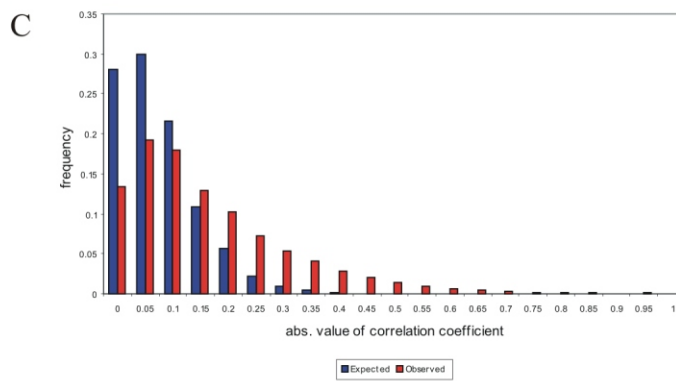

Supplement: gb-2004-5-5-r32-s4.pdf [file gb-2004-5-5-r32-s4.pdf]
